# Supplementary material
Source: PubMed Central journal article supplement (PMC3321747)
Supplement: supp_blood-2009-08-239681_Document1.pdf [file supp_blood-2009-08-239681_Document1.pdf]

## **PATIENTS AND CLINICAL RISK FACTORS**

For this study, pre-treatment cryopreserved leukemia specimens were available on a representative cohort of 207 of the 272 (76%) patients registered to COG P9906; the clinical and outcome parameters of these 207 patients did not differ significantly from all 272 patients (see Table S1 and Figure S1). As shown in Table S1 and Figure S1, the differences in various characteristics between the entire group (n=272) and the present study cohort (n=207) were examined by the statistical comparisons between the present study cohort and remaining patients (n=65) not included in the present study. Each P-value in Table S1 and Figure S1 is that of the individual test which needs to be adjusted for multiple testing. A simple Bonferroni adjustment multiplies the P-values by the total number of tests (10). After this adjustment, none of the characteristics are significantly different between the entire group and the cohort examined herein, except the test for WBC count when a cutoff value was considered.

**Table S1. Comparison of HR-ALL Patients Registered to COG P9906 (n=272) and The Subset of Patients Examined and Modeled for Gene Expression Signatures (n=207)<sup>1</sup>**

| Characteristics                       | Not Studied |            | Studied    |            | Total      |            | p-value<br>(Fisher's exact test) |
|---------------------------------------|-------------|------------|------------|------------|------------|------------|----------------------------------|
|                                       | N           | %          | N          | %          | N          | %          |                                  |
| <b>Age</b>                            |             |            |            |            |            |            |                                  |
| ≥ 10 Yrs                              | 51          | 78.46      | 132        | 63.77      | 183        | 67.28      | .0335                            |
| < 10 Yrs                              | 14          | 21.54      | 75         | 26.23      | 89         | 32.72      |                                  |
| <b>Sex</b>                            |             |            |            |            |            |            |                                  |
| Male                                  | 52          | 80         | 137        | 66.18      | 189        | 69.49      | .0442                            |
| Female                                | 13          | 20         | 70         | 33.82      | 83         | 30.51      |                                  |
| <b>WBC (x 1000/<math>\mu</math>L)</b> |             |            |            |            |            |            |                                  |
| < 50                                  | 52          | 80         | 99         | 47.83      | 151        | 55.51      | < .0001                          |
| ≥ 50                                  | 13          | 20         | 108        | 52.17      | 121        | 44.49      |                                  |
| <b>Race</b>                           |             |            |            |            |            |            |                                  |
| Hispanic or Latino                    | 15          | 23.08      | 51         | 24.64      | 66         | 24.26      | .9638                            |
| Others                                | 47          | 72.31      | 154        | 74.39      | 201        | 73.90      |                                  |
| Unknown                               | 3           | 4.61       | 2          | 0.97       | 5          | 1.84       |                                  |
| <b>MRD at day 29</b>                  |             |            |            |            |            |            |                                  |
| Negative                              | 40          | 61.54      | 124        | 59.90      | 164        | 60.29      | .7550                            |
| Positive                              | 19          | 29.23      | 67         | 32.37      | 86         | 31.62      |                                  |
| Unknown                               | 6           | 9.23       | 16         | 7.73       | 22         | 8.09       |                                  |
| <b>MLL</b>                            |             |            |            |            |            |            |                                  |
| Negative                              | 61          | 93.85      | 186        | 89.86      | 247        | 90.81      | .4617                            |
| Positive                              | 4           | 6.15       | 21         | 10.15      | 25         | 9.19       |                                  |
| <b>TCF3/PBX1</b>                      |             |            |            |            |            |            |                                  |
| Negative                              | 59          | 90.77      | 184        | 88.89      | 243        | 89.34      | .6384                            |
| Positive                              | 5           | 7.69       | 23         | 11.11      | 28         | 10.29      |                                  |
| Unknown                               | 1           | 1.54       | 0          | 0          | 1          | 0.37       |                                  |
| <b>CNS</b>                            |             |            |            |            |            |            |                                  |
| No blasts                             | 54          | 83.08      | 160        | 77.29      | 214        | 78.68      | .1009                            |
| < 5 blasts                            | 3           | 4.61       | 26         | 12.56      | 29         | 10.66      |                                  |
| ≥ 5 blasts                            | 8           | 12.31      | 21         | 10.15      | 29         | 10.66      |                                  |
| <b>Total</b>                          | <b>65</b>   | <b>100</b> | <b>207</b> | <b>100</b> | <b>272</b> | <b>100</b> |                                  |

<sup>1</sup> All unknown data were removed before statistical tests were performed.

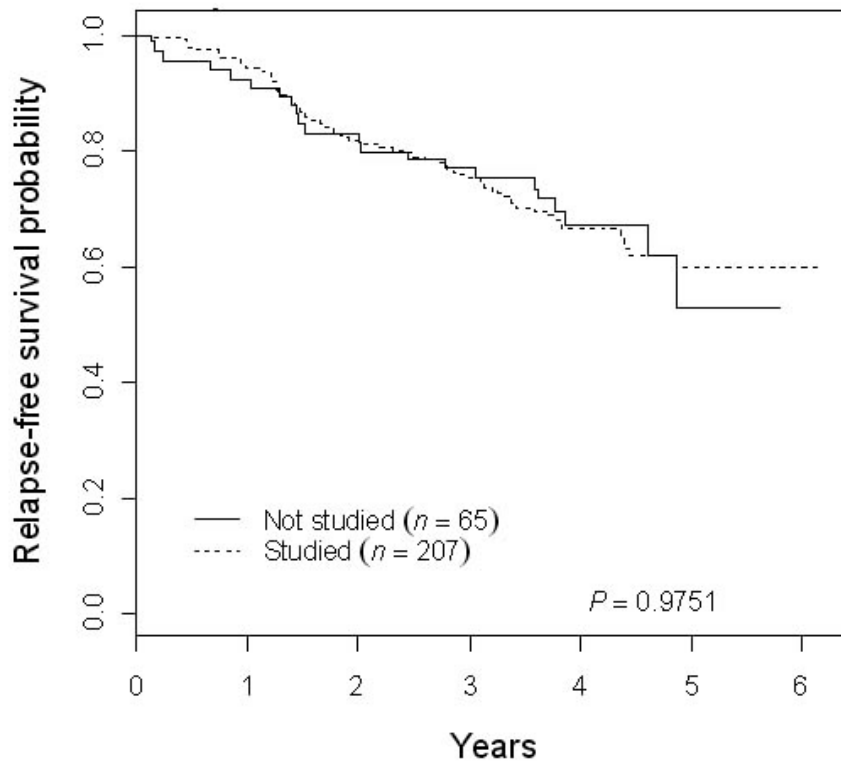

**Figure S1.** Comparison of relapse free survival between those studied ( $n=207$ ) and remaining COG P9906 patients not included in this cohort ( $n=65$ ).

The 207 patient cohort had slight male predominance (66%) and included a subset (23%, 47/201) with blasts in the CNS at diagnosis (CNS2+CNS3). Approximately 35% of the 191 specimens evaluated by flow cytometry on day 29 of induction therapy had subclinical MRD ( $>0.01\%$  blasts).<sup>3</sup> As shown in Table S2, only MRD at the end of induction therapy and increasing WBC count were significantly associated with decreased relapse free survival (RFS). The significant effect of WBC count as a continuous variable on decreased RFS was no longer seen when the cutoff of  $50 \text{ K}/\mu\text{L}$  was applied (see Section 7). A trend towards declining RFS was also observed among the 25% of children with Hispanic/Latino ethnicity contained within this cohort. In multivariate analysis, both MRD and WBC count retained significance when adjusted for one another (likelihood ratio test based on COX regression,  $P < .001$ ).

**Table S2. Association of Relapse Free Survival with Clinical and Genetic Features in the High Risk ALL Cohort**

| Characteristic        | Association with Relapse Free Survival |              |         |
|-----------------------|----------------------------------------|--------------|---------|
|                       |                                        | Hazard Ratio | p-value |
| Age                   |                                        |              |         |
| ≥ 10 Yrs              | 132                                    | 1            |         |
| < 10 Yrs              | 75                                     | 1.152        | .561    |
| Age                   |                                        |              |         |
| Median                | 13.1 yrs                               |              |         |
| Range                 | 1 – 20                                 | .995         | .817    |
| Sex                   |                                        |              |         |
| Male                  | 137                                    | 1            |         |
| Female                | 70                                     | 0.769        | .320    |
| WBC (x 1000/ $\mu$ L) |                                        |              |         |
| Median                | 62.3                                   |              |         |
| Range                 | 1 – 959                                | 1.003        | < .001  |
| MRD at Day 29         |                                        |              |         |
| Negative              | 124                                    | 1            |         |
| Positive              | 67                                     | 2.805        | < .001  |
| Ethnicity             |                                        |              |         |
| Hispanic or Latino    | 51                                     | 1.644        | .049    |
| Others                | 154                                    | 1            |         |
| <i>MLL</i>            |                                        |              |         |
| Positive              | 21                                     | 1.061        | .881    |
| Negative              | 186                                    | 1            |         |
| <i>TCF3/PBX1</i>      |                                        |              |         |
| Positive              | 23                                     | .704         | .409    |
| Negative              | 184                                    | 1            |         |
| CNS                   |                                        |              |         |
| No blasts             | 160                                    | 1            |         |
| < 5 blasts            | 26                                     | 0.897        | .708    |
| ≥ 5 blasts            | 21                                     |              |         |

## **VALIDATION COHORT**

A subset of patients from COG CCG 1961 “Treatment of Patients with Acute Lymphoblastic Leukemia with Unfavorable Features” was used as a validation cohort to determine whether similar clusters were present in a different set of high-risk patients. As described in Bhojwani *et al.*,<sup>4</sup> COG CCG 1961 enrolled a total of 2078 patients with NCI high risk features, i.e. WBC count  $\geq 50,000/\mu\text{L}$  or age  $\geq 10$  years old, from September 1996 to May 2002. Microarray data from these 99 patients were analyzed using the methods described in this paper.

## **DATA PROCESSING**

### **A. Microarray Preparation and Scanning**

After RNA quantification, cDNA preparation, and labeling, biotinylated cRNA was fragmented and hybridized to HG\_U133\_Plus2.0 oligonucleotide microarrays (Affymetrix, Santa Clara, CA) containing 54,675 probe sets. Signals were scanned (Affymetrix GeneChip Scanner) and analyzed with the Affymetrix Microarray Suite (MAS 5.0). Signal intensities and expression data were generated with the Affymetrix GCOS 1.4 software package.

### **B. Microarray Data Masking**

Prior to any intensity analysis, the microarray data were first masked to remove those probes found to be uninformative in a majority of the samples. Removal of these probe pairs improves the overall quality of the data and eliminates many non-specific signals that are shared by a particular sample type (i.e., cross-hybridizing messages present in blood and marrow samples). Each probe pair (across all 207 samples) was evaluated and masked if the mismatch (MM) was greater than the perfect match (PM) in more than 60% of the samples. This mask removed 94,767 probe pairs (15.7% of the 604,258) and had some impact on 38,588 probe sets (71%). As shown in Table S3, the net impact of masking was a significant increase in the number of present calls paralleled by a decrease in the number of absent calls.

The mask removed only seven probe sets (0.01% of the 54,675), all of which represented non-human control genes.

**Table S3. Impact of Masking on Affymetrix Statistical Calls (Reported as Percentage of Total Probes: 54,675 raw; 54,668 masked).**

|               | Present | Marginal | Absent | No call |
|---------------|---------|----------|--------|---------|
| <b>Raw</b>    | 34.9    | 1.7      | 63.3   | 0       |
| <b>Masked</b> | 48.0    | 3.1      | 48.9   | 0 (7)   |

### C. Microarray Data Filtering

Prior to any clustering, the data were filtered to remove probe sets deemed to be unrelated to disease: genes from sex-determining regions of X and Y (which simply correlate with sex), spiked control genes and globin genes (presumed to arise from contaminating normal blood cells). All filtered probe sets were selected based upon their gene symbols or chromosomal location. Table S4 lists the 89 probe sets mapped within sex-determining regions. These include the XIST gene from chromosome X and probe sets from Yp11-Yq11. All probe sets from PAR1 and PAR2 regions of both sex chromosomes are retained. Table S5 lists the 62 Affymetrix spiked control genes. Table S6 lists the twenty excluded globin probe sets with a gene symbol beginning with “HB” and the word “globin” contained within the gene title. After the filtering of these probe sets 54,504 were available for clustering.

**Table S4. X- and Y- Specific Transcripts Excluded from the Analysis (89)**

| Probe Set ID | Gene Symbol             | Cytoband |
|--------------|-------------------------|----------|
| 214218_s_at  | XIST                    | Xq13.2   |
| 221728_x_at  | XIST                    | Xq13.2   |
| 224588_at    | XIST                    | Xq13.2   |
| 224589_at    | XIST                    | Xq13.2   |
| 224590_at    | XIST                    | Xq13.2   |
| 227671_at    | XIST                    | Xq13.2   |
| 243712_at    | XIST                    | Xq13.2   |
| 201909_at    | LOC100133662 /// RPS4Y1 | Yp11.3   |
| 204409_s_at  | EIF1AY                  | Yq11.222 |
| 204410_at    | EIF1AY                  | Yq11.222 |

|             |                                                                        |                                         |
|-------------|------------------------------------------------------------------------|-----------------------------------------|
| 205000_at   | DDX3Y                                                                  | Yq11                                    |
| 205001_s_at | DDX3Y /// LOC100130220                                                 | Yq11                                    |
| 206279_at   | PRKY                                                                   | Yp11.2                                  |
| 206624_at   | LOC100130216 /// USP9Y                                                 | Yq11.2                                  |
| 206700_s_at | JARID1D                                                                | Yq11 Yq11                               |
| 206769_at   | LOC100130227 /// TMSB4Y                                                | Yq11.221                                |
| 207063_at   | CYorf14                                                                | Yq11.222                                |
| 207246_at   | LOC100130829 /// ZFY                                                   | Yp11.3                                  |
| 207646_s_at | CDY1 /// CDY1B /// CDY2A /// CDY2B                                     | Yq11.221 ///<br>Yq11.223 ///<br>Yq11.23 |
| 207647_at   | CDY1                                                                   | Yq11.23                                 |
| 207703_at   | NLGN4Y                                                                 | Yq11.221                                |
| 207893_at   | LOC100130809 /// SRY                                                   | Yp11.3                                  |
| 207909_x_at | DAZ1 /// DAZ2 /// DAZ3 /// DAZ4 ///<br>LOC732447                       | Yq11.223                                |
| 207912_s_at | DAZ1 /// DAZ2 /// DAZ3 /// DAZ4 ///<br>LOC732447                       | Yq11.223                                |
| 207916_at   | RBM1E                                                                  | Yq11.223                                |
| 207918_s_at | LOC728137 /// LOC728395 /// LOC728412 ///<br>TSPY1                     | Yp11.2                                  |
| 208067_x_at | LOC100130224 /// UTY                                                   | Yq11                                    |
| 208220_x_at | AMELY                                                                  | Yp11.2                                  |
| 208281_x_at | DAZ1 /// DAZ2 /// DAZ3 /// DAZ4 ///<br>LOC732447                       | Yq11.223                                |
| 208282_x_at | DAZ1 /// DAZ2 /// DAZ3 /// DAZ4 ///<br>LOC732447                       | Yq11.223                                |
| 208307_at   | RBM1A1 /// RBM1B /// RBM1D ///<br>RBM1E /// RBM1F /// RBM1J /// RBM3AP | Yp11.2 ///<br>Yq11.223                  |
| 208331_at   | BPY2                                                                   | Yq11                                    |
| 208332_at   | PRY /// PRY2                                                           | Yq11.223                                |
| 208339_at   | XKRY /// XKRY2                                                         | Yq11.221                                |
| 210322_x_at | UTY                                                                    | Yq11                                    |
| 211149_at   | LOC100130224 /// UTY                                                   | Yq11                                    |
| 211227_s_at | PCDH11Y                                                                | Yp11.2                                  |
| 211460_at   | TTY9A /// TTY9B                                                        | Yq11.221 ///<br>Yq11.222                |
| 211461_at   | CSPG4LYP1 /// CSPG4LYP2                                                | Yq11.223 ///<br>Yq11.23                 |
| 211462_s_at | TBL1Y                                                                  | Yp11.2                                  |
| 214131_at   | CYorf15B                                                               | Yq11.222                                |

|             |                                                                                                     |                                       |
|-------------|-----------------------------------------------------------------------------------------------------|---------------------------------------|
| 214983_at   | TTY15                                                                                               | Yq11.1                                |
| 216351_x_at | DAZ1 /// DAZ2 /// DAZ3 /// DAZ4 ///<br>LOC732447                                                    | Yq11.223                              |
| 216374_at   | LOC728137 /// LOC728395 /// LOC728412 ///<br>TSPY1                                                  | Yp11.2                                |
| 216544_at   | RBMY2FP                                                                                             | Yq11.223                              |
| 216665_s_at | TTY2                                                                                                | Yp11.2                                |
| 216673_at   | LOC100101116 /// TTY1                                                                               | Yp11.2                                |
| 216786_at   | LOC159110                                                                                           | Yq11.221                              |
| 216842_x_at | RBM /// RBMY1A1 /// RBMY1B /// RBMY1D<br>/// RBMY1E /// RBMY1F /// RBMY1H ///<br>RBMY1J /// RBMY3AP | Yp11.2 ///<br>Yq11.223 ///<br>Yq11.23 |
| 216922_x_at | DAZ1 /// DAZ2 /// DAZ3 /// DAZ4 ///<br>LOC732447                                                    | Yq11.223                              |
| 217049_x_at | PCDH11Y                                                                                             | Yp11.2                                |
| 217160_at   | TSPY1                                                                                               | Yp11.2                                |
| 217261_at   | LOC100101117 /// TTY2                                                                               | Yp11.2                                |
| 222229_x_at | LOC441533                                                                                           | Yp11.2                                |
| 223645_s_at | CYorf15B                                                                                            | Yq11.222                              |
| 223646_s_at | CYorf15B                                                                                            | Yq11.222                              |
| 224003_at   | TTY14                                                                                               | Yq11.222                              |
| 224007_at   | HSFY1 /// HSFY2                                                                                     | Yq11.222                              |
| 224040_at   | TTY5                                                                                                | Yq11.223                              |
| 224041_at   | TTY6                                                                                                | Yq11.223                              |
| 224052_at   | HSFY1 /// HSFY2                                                                                     | Yq11.222                              |
| 224142_s_at | LOC100101118 /// TTY8                                                                               | Yp11.2                                |
| 224143_at   | LOC100101118 /// TTY8                                                                               | Yp11.2                                |
| 224174_at   | TTY11                                                                                               | Yp11.2                                |
| 224195_at   | TTY12                                                                                               | Yp11.2                                |
| 224292_at   | TTY13                                                                                               | Yq11.223                              |
| 224293_at   | TTY10                                                                                               | Yq11.221                              |
| 228492_at   | LOC100130216 /// USP9Y                                                                              | Yq11.2                                |
| 230760_at   | LOC100130829 /// ZFY                                                                                | Yp11.3                                |
| 232618_at   | CYorf15A                                                                                            | Yq11.222                              |
| 233151_s_at | TTY7                                                                                                | Yp11.2                                |
| 233178_at   | TGIF2LY                                                                                             | Yp11.2                                |
| 234309_at   | TTY7                                                                                                | Yp11.2                                |
| 234715_at   | GOLGA2LY1 /// GOLGA2LY2                                                                             | Yq11.223                              |
| 234913_at   | TTY4 /// TTY4B /// TTY4C                                                                            | Yq11.2 ///<br>Yq11.223                |
| 234931_at   | AYP1p1                                                                                              | Yp11.31                               |



|              |                                       |          |
|--------------|---------------------------------------|----------|
| 235941_s_at  | LOC159110 /// LOC401629 /// LOC401630 | Yq11.221 |
| 235942_at    | LOC401629 /// LOC401630               | Yq11.221 |
| 236694_at    | CYorf15A                              | Yq11.222 |
| 1552952_at   | RBMV2FP                               | Yq11.223 |
| 1554125_a_at | NLGN4Y                                | Yq11.221 |
| 1561185_at   | TTY7                                  | Yp11.2   |
| 1561390_at   | FAM41AY                               | Yq11.221 |
| 1562313_at   | BCORL2                                | Yq11.222 |
| 1563420_at   | XGPY2                                 | Yp11.31  |
| 1565132_at   | RBMV3AP                               | Yp11.2   |
| 1565320_at   | RBMV3AP                               | Yp11.2   |
| 1570359_at   | DDX3Y                                 | Yq11     |
| 1570360_s_at | DDX3Y /// LOC100130220                | Yq11     |

**Table S5. AFX Probe Sets Excluded from the Analysis (62)**

|                |
|----------------|
| Probe Set ID   |
| AFX-BioB-5_at  |
| AFX-BioB-M_at  |
| AFX-BioB-3_at  |
| AFX-BioC-5_at  |
| AFX-BioC-3_at  |
| AFX-BioDn-5_at |
| AFX-BioDn-3_at |
| AFX-CreX-5_at  |
| AFX-CreX-3_at  |
| AFX-DapX-5_at  |
| AFX-DapX-M_at  |
| AFX-DapX-3_at  |
| AFX-LysX-5_at  |
| AFX-LysX-M_at  |
| AFX-LysX-3_at  |
| AFX-PheX-5_at  |
| AFX-PheX-M_at  |
| AFX-PheX-3_at  |
| AFX-ThrX-5_at  |
| AFX-ThrX-M_at  |
| AFX-ThrX-3_at  |
| AFX-TrpnX-5_at |
| AFX-TrpnX-M_at |

|                             |
|-----------------------------|
| AFFX-TrpnX-3_at             |
| AFFX-r2-Ec-bioB-5_at        |
| AFFX-r2-Ec-bioB-M_at        |
| AFFX-r2-Ec-bioB-3_at        |
| AFFX-r2-Ec-bioC-5_at        |
| AFFX-r2-Ec-bioC-3_at        |
| AFFX-r2-Ec-bioD-5_at        |
| AFFX-r2-Ec-bioD-3_at        |
| AFFX-r2-P1-cre-5_at         |
| AFFX-r2-P1-cre-3_at         |
| AFFX-r2-Bs-dap-5_at         |
| AFFX-r2-Bs-dap-M_at         |
| AFFX-r2-Bs-dap-3_at         |
| AFFX-r2-Bs-lys-5_at         |
| AFFX-r2-Bs-lys-M_at         |
| AFFX-r2-Bs-lys-3_at         |
| AFFX-r2-Bs-phe-5_at         |
| AFFX-r2-Bs-phe-M_at         |
| AFFX-r2-Bs-phe-3_at         |
| AFFX-r2-Bs-thr-3_s_at       |
| AFFX-r2-Bs-thr-M_s_at       |
| AFFX-r2-Bs-thr-5_s_at       |
| AFFX-HUMISGF3A/M97935_5_at  |
| AFFX-HUMISGF3A/M97935_MA_at |
| AFFX-HUMISGF3A/M97935_MB_at |
| AFFX-HUMISGF3A/M97935_3_at  |
| AFFX-HUMRGE/M10098_5_at     |
| AFFX-HUMRGE/M10098_M_at     |
| AFFX-HUMRGE/M10098_3_at     |
| AFFX-HUMGAPDH/M33197_5_at   |
| AFFX-HUMGAPDH/M33197_M_at   |
| AFFX-HUMGAPDH/M33197_3_at   |
| AFFX-HSAC07/X00351_5_at     |
| AFFX-HSAC07/X00351_M_at     |
| AFFX-HSAC07/X00351_3_at     |
| AFFX-M27830_5_at            |
| AFFX-M27830_M_at            |
| AFFX-M27830_3_at            |
| AFFX-hum_alu_at             |

**Table S6. Globin Probe Sets Excluded from the Analysis (20)**

| Probe Set ID | Gene Symbol   | Cytoband |
|--------------|---------------|----------|
| 1562981_at   | HBB           | 11p15.5  |
| 204018_x_at  | HBA1 /// HBA2 | 16p13.3  |
| 204419_x_at  | HBG1 /// HBG2 | 11p15.5  |
| 204848_x_at  | HBG1 /// HBG2 | 11p15.5  |
| 205919_at    | HBE1          | 11p15.5  |
| 206647_at    | HBZ           | 16p13.3  |
| 206834_at    | HBD           | 11p15.5  |
| 209116_x_at  | HBB           | 11p15.5  |
| 209458_x_at  | HBA1 /// HBA2 | 16p13.3  |
| 211696_x_at  | HBB           | 11p15.5  |
| 211699_x_at  | HBA1 /// HBA2 | 16p13.3  |
| 211745_x_at  | HBA1 /// HBA2 | 16p13.3  |
| 213515_x_at  | HBG1 /// HBG2 | 11p15.5  |
| 214414_x_at  | HBA1 /// HBA2 | 16p13.3  |
| 216036_at    | HBBP1         | 11p15.5  |
| 217232_x_at  | HBB           | 11p15.5  |
| 217414_x_at  | HBA1 /// HBA2 | 16p13.3  |
| 217683_at    | HBE1          | 11p15.5  |
| 220807_at    | HBQ1          | 16p13.3  |
| 240336_at    | HBM           | 16p13.3  |

**SELECTION OF CLUSTERING PROBE SETS: High CV, ROSE and COPA****A. Selection of High CV Probe Sets**

Each of the remaining 54,504 filtered probe sets was ordered by its coefficient of variation (CV = standard deviation/mean). The 254 probe sets with the highest CVs were used for the H clustering.

**B. Selection of COPA Probe Sets**

The COPA method was applied essentially as described by Tomlins et al.<sup>5</sup> First, the median expression for each probe set was adjusted to zero. Secondly, the median absolute deviation from median (MAD) was calculated and the intensities for each probe set were divided by its MAD. Finally, these MAD-normalized intensities at the 95<sup>th</sup> percentile were sorted. In order to make the comparison of all

clustering methods more comparable, an equal number of probe sets (254) was selected from the top of the sorted list and was used for clustering.

### **C. Selection of ROSE Probe Sets**

ROSE (Recognition of Outlier by Sampling Ends) was developed as an alternative method for outlier detection. In COPA, units of MAD at a fixed point (typically either the 90<sup>th</sup> or 95<sup>th</sup> percentile) rank the outliers. This fixed-point threshold confers a size bias for the clusters (higher percentile levels favor smaller groups of outlier signals). More importantly, the ranking of probe sets is by the magnitude of their deviation. Those with the greatest deviations will dominate the top of the list. The potential drawback to this is that larger groups of related samples with outlier signals may be missed if the magnitude of their variance is not extremely high.

In contrast, ROSE applies a single threshold for the magnitude of the deviation and then orders the probe sets by the size of the largest sampled group that satisfies this cutoff. Regardless of the magnitude of the difference from median, all probe sets that satisfy the threshold cutoff and are within the designated size range are considered equal. Details of the ROSE method, as it was applied in this study, follow. The intensity values for each of the 54,504 probe sets were plotted individually in ascending order. The plots were divided into thirds and the intensities from the middle third were used to generate trend lines by least squares fitting. Groups of  $2*k$  (where  $k$  is an integer from 2 to one third of the sample size) were sampled from each end of the intensity plots and the median intensities of these groups were compared to the trend lines. The choice of a trend line as the metric, rather than simply median, is meant to reduce the number of probe sets that simply have a high variance, but do not necessarily contain distinct clusters of outlier samples.

Figure S2 illustrates how this is accomplished. Increasing sized groups are sampled from each end until the median intensity of a group fails to exceed the desired threshold. The largest value of  $k$  at which each probe set surpasses the threshold is recorded. The probe sets are then ordered by their

maximum  $k$  values. In this study a probe set was selected for clustering if  $k \geq 6$  and the median intensity of the sampled group was at least 7-fold its corresponding point on the trend line. This threshold for  $k$  was selected in order to enrich for groups in the range of 10 or more members (greater than 5% of the population size). Smaller groups, although still possibly quite interesting, are much less likely to yield statistically significant results. The 7-fold threshold was chosen to minimize the impact of signal noise on probe set selection and also to limit the total number of probe sets to be used for clustering. Only 254 probe sets out of 54,504 (0.5%) satisfied these criteria of 7X threshold and  $k$  values  $\geq 6$ .

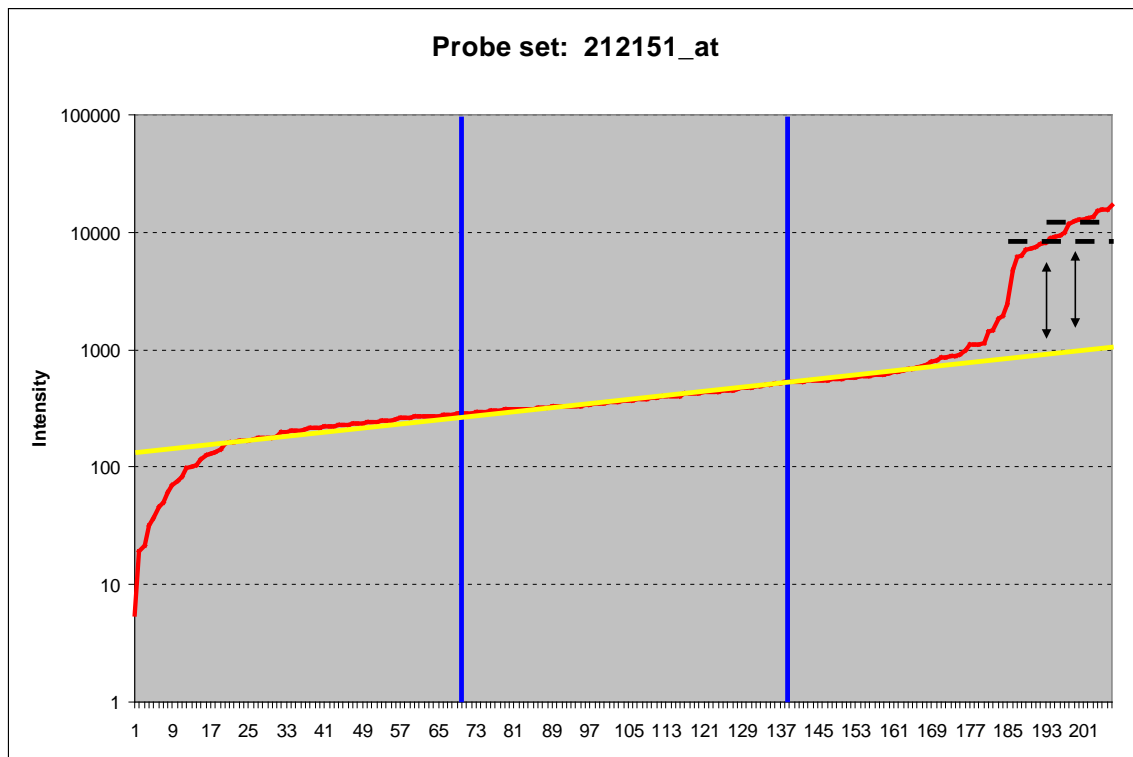

**Figure S2. ROSE Methodology.** Red line indicates signal intensities for all 207 patient samples for probe 212151\_at. Vertical blue lines depict partitioning of samples into thirds. A least-squares curve fit is applied to the middle third of the samples and the resulting trend line is shown in yellow. Different sample groups are illustrated by the dashed lines at the top right. As shown by the double arrowed lines, the median value from each of these groups is compared to the trend line.

## D. Outlier Probe Set Selection for CCG 1961 (Validation Cohort)

Masking and filtering was applied to the CCG 1961 data set exactly the same way as in P9906. ROSE used the same 7-fold threshold for intensity and  $k \geq 6$ . 167 probe sets (0.3% of the 54,504) satisfied these criteria. COPA clustering used the top 167 probe sets at the 95<sup>th</sup> percentile level. HC used the top 167 probe sets ranked by their CV.

## E. Probe Sets Used For Clustering

**Table S7A.** Probe Sets Used in P9906 and CCG1961

The probe sets common to HC and either COPA or ROSE are shown in bold; those shared between COPA and either HC or ROSE are italicized.

| P9906 Probe Sets (254) |                    |                    | CCG 1961 Probe Sets (167) |                     |                     |
|------------------------|--------------------|--------------------|---------------------------|---------------------|---------------------|
| HC                     | COPA               | ROSE               | HC                        | COPA                | ROSE                |
| 117_at                 | 38487_at           | <i>38487_at</i>    | 117_at                    | <b>1554008_at</b>   | <b>1554008_at</b>   |
| <b>1552398_a_at</b>    | 46665_at           | <i>46665_at</i>    | <b>1554008_at</b>         | <b>1555167_s_at</b> | <b>1555167_s_at</b> |
| 1553328_a_at           | <b>200800_s_at</b> | <b>200799_at</b>   | 1554140_at                | 1555216_a_at        | <i>1555578_at</i>   |
| 1553613_s_at           | <b>201105_at</b>   | <b>200800_s_at</b> | 1554655_a_at              | <i>1555578_at</i>   | <b>1555579_s_at</b> |
| <b>1554633_a_at</b>    | 201566_x_at        | 201012_at          | <b>1555167_s_at</b>       | <b>1555579_s_at</b> | <i>1559394_a_at</i> |
| 1554892_a_at           | 201579_at          | <b>201105_at</b>   | <b>1555579_s_at</b>       | <b>1557534_at</b>   | <b>1559477_s_at</b> |
| <b>1555579_s_at</b>    | 201656_at          | <b>201215_at</b>   | <b>1557534_at</b>         | <b>1559280_a_at</b> | <i>1560109_s_at</i> |
| <b>1557534_at</b>      | 201669_s_at        | <i>201579_at</i>   | <b>1559280_a_at</b>       | <i>1559394_a_at</i> | <b>1560225_at</b>   |
| <b>1559477_s_at</b>    | <b>201842_s_at</b> | <i>201656_at</i>   | <b>1559477_s_at</b>       | <b>1559477_s_at</b> | 1560483_at          |
| 1559696_at             | <b>202178_at</b>   | <b>201842_s_at</b> | 1559696_at                | <i>1560109_s_at</i> | 1560581_at          |
| 1559697_a_at           | 202206_at          | <b>202178_at</b>   | 1559910_at                | <b>1560225_at</b>   | <i>1565558_at</i>   |
| 1566772_at             | 202410_x_at        | <i>202206_at</i>   | <b>1560225_at</b>         | <b>1562903_at</b>   | <i>200800_s_at</i>  |
| <b>200799_at</b>       | <b>202411_at</b>   | 202207_at          | <b>1562903_at</b>         | <i>1565558_at</i>   | <i>201579_at</i>    |
| <b>200800_s_at</b>     | <b>202859_x_at</b> | 202273_at          | 1567912_s_at              | <i>200800_s_at</i>  | <b>201842_s_at</b>  |
| <b>201105_at</b>       | <b>202917_s_at</b> | 202289_s_at        | 201131_s_at               | <i>201579_at</i>    | <i>202178_at</i>    |
| <b>201215_at</b>       | 202976_s_at        | 202336_s_at        | 201215_at                 | <b>201842_s_at</b>  | <i>202289_s_at</i>  |
| 201839_s_at            | 202988_s_at        | 202409_at          | 201243_s_at               | <i>202178_at</i>    | <i>202581_at</i>    |
| <b>201842_s_at</b>     | <b>203290_at</b>   | <b>202411_at</b>   | <b>201842_s_at</b>        | <i>202289_s_at</i>  | <i>202890_at</i>    |
| 202018_s_at            | <b>203329_at</b>   | <b>202859_x_at</b> | 201843_s_at               | 202478_at           | <i>203038_at</i>    |
| <b>202178_at</b>       | <b>203476_at</b>   | 202890_at          | 202007_at                 | <i>202581_at</i>    | <b>203290_at</b>    |
| <b>202411_at</b>       | <b>203535_at</b>   | <b>202917_s_at</b> | 202609_at                 | <i>202890_at</i>    | <i>203373_at</i>    |
| <b>202859_x_at</b>     | <b>203695_s_at</b> | <i>202976_s_at</i> | 203131_at                 | <i>203038_at</i>    | <i>203434_s_at</i>  |
| <b>202917_s_at</b>     | <b>203757_s_at</b> | <i>202988_s_at</i> | 203216_s_at               | <b>203290_at</b>    | <i>203476_at</i>    |

|                    |                    |                    |
|--------------------|--------------------|--------------------|
| 203131_at          | 203865_s_at        | <b>203290_at</b>   |
| 203153_at          | 203910_at          | <b>203329_at</b>   |
| <b>203290_at</b>   | 203921_at          | <b>203335_at</b>   |
| <b>203329_at</b>   | <b>203948_s_at</b> | <b>203394_s_at</b> |
| <b>203335_at</b>   | <b>203949_at</b>   | <b>203476_at</b>   |
| <b>203394_s_at</b> | <b>204066_s_at</b> | <b>203535_at</b>   |
| <b>203476_at</b>   | <b>204069_at</b>   | <b>203695_s_at</b> |
| <b>203535_at</b>   | <b>204114_at</b>   | <b>203726_s_at</b> |
| <b>203695_s_at</b> | <b>204150_at</b>   | <b>203757_s_at</b> |
| <b>203726_s_at</b> | <b>204304_s_at</b> | 203865_s_at        |
| <b>203757_s_at</b> | 204439_at          | 203910_at          |
| <b>203948_s_at</b> | 204456_s_at        | 203921_at          |
| <b>203949_at</b>   | <b>204895_x_at</b> | <b>203948_s_at</b> |
| 203973_s_at        | <b>204913_s_at</b> | <b>203949_at</b>   |
| <b>204014_at</b>   | <b>204914_s_at</b> | <b>204014_at</b>   |
| 204015_s_at        | <b>204915_s_at</b> | <b>204066_s_at</b> |
| <b>204066_s_at</b> | <b>205239_at</b>   | <b>204069_at</b>   |
| <b>204069_at</b>   | <b>205253_at</b>   | <b>204114_at</b>   |
| <b>204114_at</b>   | 205347_s_at        | <b>204150_at</b>   |
| 204134_at          | 205413_at          | <b>204304_s_at</b> |
| <b>204150_at</b>   | <b>205489_at</b>   | 204439_at          |
| 204273_at          | <b>205656_at</b>   | <b>204614_at</b>   |
| <b>204304_s_at</b> | <b>205844_at</b>   | <b>204895_x_at</b> |
| 204326_x_at        | <b>205899_at</b>   | <b>204913_s_at</b> |
| 204351_at          | 205914_s_at        | <b>204914_s_at</b> |
| 204363_at          | 205980_s_at        | <b>204915_s_at</b> |
| 204469_at          | 206028_s_at        | 204999_s_at        |
| 204482_at          | 206040_s_at        | 205237_at          |
| <b>204614_at</b>   | 206067_s_at        | <b>205239_at</b>   |
| 204684_at          | <b>206070_s_at</b> | <b>205253_at</b>   |
| 204745_x_at        | 206150_at          | 205286_at          |
| <b>204895_x_at</b> | 206181_at          | 205347_s_at        |
| <b>204913_s_at</b> | <b>206258_at</b>   | <b>205402_x_at</b> |
| <b>204914_s_at</b> | 206298_at          | 205413_at          |
| <b>204915_s_at</b> | <b>206413_s_at</b> | <b>205445_at</b>   |
| 204971_at          | <b>206478_at</b>   | 205488_at          |
| <b>205239_at</b>   | 206637_at          | <b>205489_at</b>   |
| <b>205253_at</b>   | <b>207110_at</b>   | <b>205493_s_at</b> |
| <b>205402_x_at</b> | 207173_x_at        | <b>205656_at</b>   |
| 205405_at          | 207261_at          | <b>205844_at</b>   |

|                    |                    |                    |
|--------------------|--------------------|--------------------|
| <b>203290_at</b>   | 203476_at          | 203695_s_at        |
| 203304_at          | 203695_s_at        | 203835_at          |
| 203632_s_at        | 203835_at          | 203865_s_at        |
| <b>204014_at</b>   | 203865_s_at        | <b>204014_at</b>   |
| <b>204015_s_at</b> | <b>204014_at</b>   | <b>204015_s_at</b> |
| 204066_s_at        | <b>204069_at</b>   | <b>204069_at</b>   |
| <b>204069_at</b>   | 204114_at          | 204114_at          |
| 204337_at          | 204304_s_at        | 204439_at          |
| <b>204895_x_at</b> | 204416_x_at        | <b>204895_x_at</b> |
| <b>205253_at</b>   | 204439_at          | 204913_s_at        |
| <b>205382_s_at</b> | <b>204895_x_at</b> | 204914_s_at        |
| <b>205413_at</b>   | 204914_s_at        | 204915_s_at        |
| 205493_s_at        | 204915_s_at        | 204944_at          |
| 205573_s_at        | 204944_at          | 205109_s_at        |
| <b>205627_at</b>   | 205109_s_at        | <b>205253_at</b>   |
| <b>205857_at</b>   | <b>205253_at</b>   | <b>205413_at</b>   |
| <b>205899_at</b>   | <b>205382_s_at</b> | 205489_at          |
| 205942_s_at        | <b>205413_at</b>   | 205544_s_at        |
| 205951_at          | 205477_s_at        | 205592_at          |
| 205980_s_at        | 205489_at          | <b>205857_at</b>   |
| 205987_at          | 205544_s_at        | 205870_at          |
| 206070_s_at        | <b>205627_at</b>   | <b>205899_at</b>   |
| 206084_at          | <b>205857_at</b>   | 205936_s_at        |
| <b>206135_at</b>   | 205870_at          | 205946_at          |
| 206204_at          | <b>205899_at</b>   | 206111_at          |
| <b>206207_at</b>   | 205936_s_at        | 206181_at          |
| 206298_at          | 205946_at          | <b>206207_at</b>   |
| <b>206371_at</b>   | 206111_at          | 206413_s_at        |
| 206432_at          | <b>206135_at</b>   | <b>206756_at</b>   |
| 206741_at          | 206181_at          | 208285_at          |
| <b>206756_at</b>   | <b>206207_at</b>   | <b>209291_at</b>   |
| 206785_s_at        | <b>206371_at</b>   | 209392_at          |
| 206851_at          | 206413_s_at        | 209570_s_at        |
| 207638_at          | 206710_s_at        | 209602_s_at        |
| 207768_at          | <b>206756_at</b>   | 209822_s_at        |
| 207802_at          | 206881_s_at        | <b>209905_at</b>   |
| 208029_s_at        | 208285_at          | 210016_at          |
| 208090_s_at        | 208470_s_at        | <b>210665_at</b>   |
| 208148_at          | <b>209291_at</b>   | <b>210683_at</b>   |
| 208605_s_at        | 209392_at          | 211306_s_at        |

|             |             |             |
|-------------|-------------|-------------|
| 205445_at   | 207453_s_at | 205899_at   |
| 205489_at   | 207696_at   | 205950_s_at |
| 205493_s_at | 208303_s_at | 206028_s_at |
| 205513_at   | 208567_s_at | 206067_s_at |
| 205557_at   | 209087_x_at | 206070_s_at |
| 205592_at   | 209101_at   | 206181_at   |
| 205593_s_at | 209291_at   | 206258_at   |
| 205614_x_at | 209604_s_at | 206298_at   |
| 205656_at   | 209728_at   | 206310_at   |
| 205844_at   | 209897_s_at | 206413_s_at |
| 205857_at   | 209905_at   | 206478_at   |
| 205858_at   | 209959_at   | 206633_at   |
| 205863_at   | 210016_at   | 206756_at   |
| 205899_at   | 210664_s_at | 206836_at   |
| 205950_s_at | 210665_at   | 207173_x_at |
| 206070_s_at | 211340_s_at | 207651_at   |
| 206172_at   | 211657_at   | 207978_s_at |
| 206207_at   | 211735_x_at | 208303_s_at |
| 206258_at   | 212062_at   | 208553_at   |
| 206310_at   | 212077_at   | 208567_s_at |
| 206413_s_at | 212094_at   | 208937_s_at |
| 206461_x_at | 212148_at   | 209101_at   |
| 206478_at   | 212151_at   | 209291_at   |
| 206633_at   | 212158_at   | 209301_at   |
| 206634_at   | 212592_at   | 209604_s_at |
| 206749_at   | 213005_s_at | 209875_s_at |
| 206836_at   | 213150_at   | 209892_at   |
| 206932_at   | 213273_at   | 209897_s_at |
| 207110_at   | 213317_at   | 209905_at   |
| 207651_at   | 213371_at   | 210016_at   |
| 207978_s_at | 213479_at   | 210150_s_at |
| 208148_at   | 213714_at   | 210640_s_at |
| 208173_at   | 213737_x_at | 210664_s_at |
| 208303_s_at | 213844_at   | 210665_at   |
| 208567_s_at | 214043_at   | 210869_s_at |
| 208581_x_at | 214453_s_at | 211340_s_at |
| 208937_s_at | 214497_s_at | 211341_at   |
| 209289_at   | 214651_s_at | 211506_s_at |
| 209290_s_at | 215028_at   | 211560_s_at |
| 209291_at   | 215177_s_at | 211597_s_at |

|             |             |             |
|-------------|-------------|-------------|
| 209289_at   | 209570_s_at | 211382_s_at |
| 209291_at   | 209602_s_at | 211560_s_at |
| 209436_at   | 209822_s_at | 211743_s_at |
| 209687_at   | 209905_at   | 212148_at   |
| 209774_x_at | 210016_at   | 212151_at   |
| 209905_at   | 210432_s_at | 212592_at   |
| 210095_s_at | 210683_at   | 212942_s_at |
| 210135_s_at | 211306_s_at | 213005_s_at |
| 210402_at   | 211518_s_at | 213050_at   |
| 210546_x_at | 211560_s_at | 213317_at   |
| 210664_s_at | 212094_at   | 213371_at   |
| 210665_at   | 212148_at   | 213423_x_at |
| 210683_at   | 212151_at   | 213906_at   |
| 211276_at   | 212592_at   | 214020_x_at |
| 211518_s_at | 213005_s_at | 214446_at   |
| 211674_x_at | 213150_at   | 214651_s_at |
| 211719_x_at | 213317_at   | 214978_s_at |
| 211743_s_at | 213371_at   | 215177_s_at |
| 212148_at   | 213423_x_at | 216623_x_at |
| 212554_at   | 213558_at   | 217109_at   |
| 212942_s_at | 213566_at   | 217110_s_at |
| 213032_at   | 214020_x_at | 217963_s_at |
| 213150_at   | 214043_at   | 218922_s_at |
| 213317_at   | 214446_at   | 219355_at   |
| 213371_at   | 214651_s_at | 219463_at   |
| 213380_x_at | 214978_s_at | 219489_s_at |
| 213418_at   | 215177_s_at | 219840_s_at |
| 213436_at   | 215305_at   | 219855_at   |
| 213479_at   | 216623_x_at | 220276_at   |
| 213558_at   | 217109_at   | 220377_at   |
| 213791_at   | 217110_s_at | 220922_s_at |
| 213993_at   | 217963_s_at | 222162_s_at |
| 213994_s_at | 218922_s_at | 222288_at   |
| 214433_s_at | 219225_at   | 222450_at   |
| 214651_s_at | 219355_at   | 223075_s_at |
| 214769_at   | 219463_at   | 223754_at   |
| 214774_x_at | 219489_s_at | 223786_at   |
| 215108_x_at | 219840_s_at | 224022_x_at |
| 215121_x_at | 219855_at   | 224762_at   |
| 215305_at   | 220276_at   | 225369_at   |



|                    |                    |                    |
|--------------------|--------------------|--------------------|
| 209301_at          | 215426_at          | <b>211657_at</b>   |
| 209369_at          | 215666_at          | <b>212062_at</b>   |
| 209757_s_at        | 216834_at          | 212077_at          |
| <b>209905_at</b>   | 217083_at          | <b>212094_at</b>   |
| <b>210016_at</b>   | <b>217109_at</b>   | <b>212148_at</b>   |
| 210254_at          | 217963_s_at        | <b>212151_at</b>   |
| <b>210640_s_at</b> | 218086_at          | 212158_at          |
| <b>210664_s_at</b> | 218468_s_at        | 212192_at          |
| <b>210665_at</b>   | 218469_at          | 212592_at          |
| 210746_s_at        | 218625_at          | <b>213005_s_at</b> |
| 211338_at          | 218804_at          | <b>213150_at</b>   |
| 211456_x_at        | 218847_at          | <b>213258_at</b>   |
| <b>211506_s_at</b> | 219463_at          | <b>213317_at</b>   |
| <b>211560_s_at</b> | 219489_s_at        | 213362_at          |
| <b>211597_s_at</b> | 219837_s_at        | <b>213371_at</b>   |
| 211634_x_at        | 220059_at          | <b>213479_at</b>   |
| 211639_x_at        | 220075_s_at        | 213714_at          |
| 211655_at          | 220377_at          | 213802_at          |
| <b>211657_at</b>   | <b>220416_at</b>   | <b>213808_at</b>   |
| 211820_x_at        | 220638_s_at        | <b>213844_at</b>   |
| <b>212062_at</b>   | 220759_at          | 213880_at          |
| <b>212094_at</b>   | 221066_at          | 214146_s_at        |
| 212104_s_at        | 221254_s_at        | <b>214349_at</b>   |
| <b>212148_at</b>   | <b>221933_at</b>   | 214534_at          |
| <b>212151_at</b>   | 222934_s_at        | 214537_at          |
| 212185_x_at        | 223121_s_at        | <b>214651_s_at</b> |
| 212501_at          | <b>223278_at</b>   | <b>214774_x_at</b> |
| 212859_x_at        | 223449_at          | <b>215177_s_at</b> |
| <b>213005_s_at</b> | 223502_s_at        | 215182_x_at        |
| <b>213150_at</b>   | 223720_at          | <b>215379_x_at</b> |
| 213194_at          | 223885_at          | <b>215692_s_at</b> |
| <b>213258_at</b>   | <b>224215_s_at</b> | <b>216623_x_at</b> |
| <b>213317_at</b>   | 225369_at          | 217083_at          |
| <b>213371_at</b>   | 225436_at          | <b>217109_at</b>   |
| 213418_at          | 225483_at          | <b>217110_s_at</b> |
| <b>213479_at</b>   | <b>225496_s_at</b> | 217276_x_at        |
| 213488_at          | 225660_at          | 217281_x_at        |
| 213791_at          | <b>225681_at</b>   | 217284_x_at        |
| <b>213808_at</b>   | 226282_at          | 217963_s_at        |

|                    |                    |                    |
|--------------------|--------------------|--------------------|
| 215733_x_at        | 220377_at          | 225782_at          |
| 216320_x_at        | 220528_at          | 225977_at          |
| <b>216623_x_at</b> | 222162_s_at        | <b>226034_at</b>   |
| <b>217109_at</b>   | 222258_s_at        | 226096_at          |
| <b>217110_s_at</b> | <b>222288_at</b>   | 226282_at          |
| 217138_x_at        | 222347_at          | 226636_at          |
| 218507_at          | <b>222450_at</b>   | 226913_s_at        |
| 219093_at          | 223319_at          | 227006_at          |
| <b>219225_at</b>   | 223422_s_at        | <b>227289_at</b>   |
| 219525_at          | <b>223786_at</b>   | <b>227372_s_at</b> |
| 220225_at          | <b>224022_x_at</b> | 227377_at          |
| 221731_x_at        | 224762_at          | 227441_s_at        |
| 221870_at          | 225977_at          | 227949_at          |
|                    |                    | 228018_at          |
| 221901_at          | <b>226034_at</b>   |                    |
| <b>222288_at</b>   | 226096_at          | 228057_at          |
| 222315_at          | 226282_at          | 228116_at          |
| <b>222450_at</b>   | 226636_at          | 228262_at          |
| 222885_at          | 226913_s_at        | <b>228462_at</b>   |
| 223235_s_at        | <b>227289_at</b>   | <b>228863_at</b>   |
| 223611_s_at        | <b>227372_s_at</b> | 228994_at          |
| 223612_s_at        | 227377_at          | 229108_at          |
| <b>223786_at</b>   | 227441_s_at        | 229247_at          |
| <b>224022_x_at</b> | 227949_at          | <b>229638_at</b>   |
| 225575_at          | 228018_at          | 229975_at          |
| 225842_at          | 228057_at          | 230030_at          |
| <b>226034_at</b>   | 228116_at          | 230668_at          |
| 226676_at          | 228262_at          | 230680_at          |
| 226677_at          | <b>228462_at</b>   | <b>231040_at</b>   |
| 227174_at          | <b>228863_at</b>   | <b>231223_at</b>   |
| <b>227289_at</b>   | 228994_at          | 231257_at          |
| <b>227372_s_at</b> | <b>229638_at</b>   | 231316_at          |
| 227481_at          | 229661_at          | 231455_at          |
| 227758_at          | <b>229963_at</b>   | 231600_at          |
| <b>228462_at</b>   | 229975_at          | 231859_at          |
| 228766_at          | 230472_at          | <b>231899_at</b>   |
| 228780_at          | 230680_at          | 232010_at          |
| <b>228863_at</b>   | <b>231040_at</b>   | 232231_at          |
| 229147_at          | <b>231223_at</b>   | 232636_at          |
| <b>229638_at</b>   | 231257_at          | 232903_at          |

|                    |                    |                    |
|--------------------|--------------------|--------------------|
| <b>213844_at</b>   | <b>226415_at</b>   | 218086_at          |
| 213993_at          | <b>226913_s_at</b> | 218330_s_at        |
| <b>214349_at</b>   | <b>227099_s_at</b> | 218468_s_at        |
| <b>214651_s_at</b> | <b>227289_at</b>   | 218469_at          |
| <b>214774_x_at</b> | <b>227439_at</b>   | 218847_at          |
| 215108_x_at        | 227440_at          | 219463_at          |
| <b>215177_s_at</b> | 227441_s_at        | 219470_x_at        |
| 215214_at          | 227711_at          | 219489_s_at        |
| <b>215379_x_at</b> | <b>227949_at</b>   | 219837_s_at        |
| <b>215692_s_at</b> | 228017_s_at        | <b>220010_at</b>   |
| 215784_at          | <b>228057_at</b>   | 220059_at          |
| 216320_x_at        | <b>228434_at</b>   | 220377_at          |
| 216336_x_at        | <b>228462_at</b>   | <b>220416_at</b>   |
| 216401_x_at        | 228599_at          | 221254_s_at        |
| 216491_x_at        | <b>228854_at</b>   | <b>221933_at</b>   |
| 216560_x_at        | <b>228863_at</b>   | 222921_s_at        |
| <b>216623_x_at</b> | 228918_at          | 222934_s_at        |
| 216853_x_at        | 229029_at          | 223121_s_at        |
| 216874_at          | 229149_at          | <b>223786_at</b>   |
| 216984_x_at        | 229233_at          | <b>224215_s_at</b> |
| <b>217109_at</b>   | 229461_x_at        | 224520_s_at        |
| <b>217110_s_at</b> | <b>229638_at</b>   | 225436_at          |
| 217143_s_at        | <b>229661_at</b>   | 225483_at          |
| 217148_x_at        | 229967_at          | <b>225496_s_at</b> |
| 217165_x_at        | 229975_at          | 225597_at          |
| 217179_x_at        | <b>229985_at</b>   | <b>225681_at</b>   |
| 217235_x_at        | 230030_at          | <b>226084_at</b>   |
| 217258_x_at        | 230110_at          | 226282_at          |
| 217388_s_at        | 230306_at          | <b>226415_at</b>   |
| 217623_at          | 230468_s_at        | <b>226676_at</b>   |
| 218145_at          | 230472_at          | 226733_at          |
| 219093_at          | <b>230537_at</b>   | <b>226913_s_at</b> |
| 219360_s_at        | 230668_at          | 227006_at          |
| 219666_at          | 230698_at          | <b>227099_s_at</b> |
| 219714_s_at        | 230803_s_at        | <b>227289_at</b>   |
| <b>220010_at</b>   | 230817_at          | <b>227439_at</b>   |
| <b>220416_at</b>   | 231040_at          | 227440_at          |
| 221215_s_at        | <b>231223_at</b>   | 227441_s_at        |

|                  |                  |                  |
|------------------|------------------|------------------|
| 229934_at        | 231503_at        | 234985_at        |
| <b>229963_at</b> | 231600_at        | 235343_at        |
| 230110_at        | <b>231899_at</b> | <b>235557_at</b> |
| 230372_at        | 232010_at        | 235988_at        |
| 230495_at        | 232231_at        | 236430_at        |
| <b>231040_at</b> | 232636_at        | 236489_at        |
| <b>231223_at</b> | <b>235557_at</b> | 237207_at        |
| <b>231899_at</b> | 235911_at        | 237421_at        |
| 232523_at        | 235988_at        | 237466_s_at      |
| 233038_at        | 236489_at        | 238617_at        |
| 233463_at        | 237421_at        | 238778_at        |
| 233969_at        | 237466_s_at      | 239657_x_at      |
| 235004_at        | 237974_at        | 239964_at        |
| <b>235557_at</b> | 238617_at        | 240032_at        |
| 235700_at        | 239610_at        | 240179_at        |
| 235771_at        | 239657_x_at      | 240245_at        |
| 236301_at        | 239964_at        | 240336_at        |
| 237802_at        | 240032_at        | 240347_at        |
| 238091_at        | 240245_at        | 240466_at        |
| 238175_at        | 240347_at        | 240496_at        |
| 240758_at        | 240466_at        | 241506_at        |
| <b>242172_at</b> | 240496_at        | 241960_at        |
| 243533_x_at      | <b>242172_at</b> | <b>242172_at</b> |
| <b>243917_at</b> | 242747_at        | 242468_at        |
| 243932_at        | <b>243917_at</b> | <b>243917_at</b> |

|                    |                  |                  |
|--------------------|------------------|------------------|
| 221766_s_at        | <b>231257_at</b> | <b>227949_at</b> |
| <b>221933_at</b>   | 231455_at        | 228017_s_at      |
| 222288_at          | 231706_s_at      | <b>228057_at</b> |
| <b>223278_at</b>   | <b>231771_at</b> | <b>228262_at</b> |
| 223678_s_at        | 231899_at        | <b>228297_at</b> |
| <b>223786_at</b>   | <b>232231_at</b> | <b>228434_at</b> |
| 223939_at          | 232530_at        | <b>228462_at</b> |
| <b>224215_s_at</b> | <b>233225_at</b> | <b>228854_at</b> |
| <b>225496_s_at</b> | 233847_x_at      | <b>228863_at</b> |
| <b>225681_at</b>   | 234261_at        | 229233_at        |
| 226034_at          | 234803_at        | 229461_x_at      |
| <b>226084_at</b>   | 234849_at        | <b>229638_at</b> |
| 226189_at          | 234985_at        | <b>229661_at</b> |
| 226325_at          | 235284_s_at      | 229975_at        |
| <b>226415_at</b>   | 235666_at        | <b>229985_at</b> |
| 226492_at          | 235721_at        | 230110_at        |
| 226621_at          | 235911_at        | <b>230128_at</b> |
| <b>226676_at</b>   | <b>235988_at</b> | 230130_at        |
| 226677_at          | 236430_at        | 230472_at        |
| 226757_at          | <b>236489_at</b> | <b>230537_at</b> |
| 226818_at          | 236633_at        | 230698_at        |
| <b>226913_s_at</b> | 236773_at        | 230803_s_at      |
| <b>227099_s_at</b> | 236967_at        | 230817_at        |
| 227195_at          | 237069_s_at      | 231040_at        |
| <b>227289_at</b>   | 237238_at        | 231166_at        |
| <b>227439_at</b>   | 237717_x_at      | <b>231223_at</b> |
| 227697_at          | 237828_at        | <b>231257_at</b> |
| <b>227949_at</b>   | 237978_at        | 231455_at        |
| <b>228057_at</b>   | <b>238018_at</b> | 231513_at        |
| <b>228262_at</b>   | 238689_at        | <b>231771_at</b> |
| <b>228297_at</b>   | 238900_at        | 231899_at        |
| <b>228434_at</b>   | 239361_at        | <b>232231_at</b> |
| <b>228462_at</b>   | <b>240179_at</b> | <b>232523_at</b> |
| <b>228854_at</b>   | <b>240336_at</b> | <b>232636_at</b> |
| <b>228863_at</b>   | <b>240758_at</b> | 232914_s_at      |
| <b>229638_at</b>   | 240794_at        | <b>233225_at</b> |
| <b>229661_at</b>   | 241527_at        | 234261_at        |
| <b>229985_at</b>   | 241535_at        | 235521_at        |
| <b>230128_at</b>   | 242172_at        | 235666_at        |
| 230255_at          | 242385_at        | 235911_at        |
| 230291_s_at        | <b>242457_at</b> | <b>235988_at</b> |

|                    |                     |                     |
|--------------------|---------------------|---------------------|
| <b>230537_at</b>   | <b>242468_at</b>    | 236430_at           |
| 230788_at          | 242747_at           | <b>236489_at</b>    |
| 230791_at          | <b>243533_x_at</b>  | 236773_at           |
| 231202_at          | 244002_at           | <b>238018_at</b>    |
| <b>231223_at</b>   | 244155_x_at         | 238689_at           |
| <b>231257_at</b>   | <b>244665_at</b>    | 239657_x_at         |
| <b>231771_at</b>   | 244750_at           | <b>240179_at</b>    |
| <b>232231_at</b>   | 244782_at           | <b>240336_at</b>    |
| <b>232523_at</b>   | <b>1552398_a_at</b> | <b>240758_at</b>    |
| 232629_at          | 1552767_a_at        | 241535_at           |
| <b>232636_at</b>   | 1553629_a_at        | <b>241960_at</b>    |
| <b>233225_at</b>   | 1553963_at          | 242172_at           |
| 234830_at          | 1554343_a_at        | 242385_at           |
| 235249_at          | 1554912_at          | <b>242457_at</b>    |
| 235371_at          | 1555220_a_at        | <b>242468_at</b>    |
| <b>235988_at</b>   | <b>1555579_s_at</b> | <b>243533_x_at</b>  |
| <b>236489_at</b>   | 1555745_a_at        | <b>244665_at</b>    |
| 237471_at          | <b>1557534_at</b>   | 244750_at           |
| 237613_at          | 1557876_at          | <b>1552398_a_at</b> |
| 237625_s_at        | 1559394_a_at        | 1552511_a_at        |
| <b>238018_at</b>   | 1559459_at          | 1552767_a_at        |
| 238423_at          | <b>1559477_s_at</b> | 1553629_a_at        |
| 240104_at          | 1559842_at          | 1554343_a_at        |
| <b>240179_at</b>   | 1559865_at          | <b>1554633_a_at</b> |
| <b>240336_at</b>   | 1560315_at          | <b>1555579_s_at</b> |
| <b>240758_at</b>   | 1560642_at          | 1555745_a_at        |
| <b>241960_at</b>   | 1561025_at          | 1555756_a_at        |
| <b>242457_at</b>   | 1563868_a_at        | <b>1557534_at</b>   |
| <b>242468_at</b>   | 1566825_at          | 1559394_a_at        |
| 242541_at          | 1568603_at          | 1559459_at          |
| <b>243533_x_at</b> | 1569591_at          | <b>1559477_s_at</b> |
| 244463_at          | 1569663_at          | 1561025_at          |
| <b>244665_at</b>   | 1570058_at          | 1566825_at          |

**Table S7B.** Overlap of Probe Sets Used in Either P9906 or CCG1961

| P9906 (254 total) |            |             | CCG1961 (167 total) |            |             |
|-------------------|------------|-------------|---------------------|------------|-------------|
|                   | COPA       | ROSE        |                     | COPA       | ROSE        |
| HC                | 96 (37.8%) | 135 (53.1%) | HC                  | 55 (32.9%) | 46 (27.5%)  |
| COPA              | --         | 169 (66.5%) | COPA                | --         | 130 (77.8%) |
| HC & COPA         | --         | 94 (37.0%)  | HC & COPA           | --         | 42 (25.1%)  |

**Table S7C:** Common P9906 and CCG1961 Probe Sets by Method

|             | HC (1961)  | COPA (1961) | ROSE (1961) |
|-------------|------------|-------------|-------------|
| HC (9906)   | 55 (32.9%) | 56 (33.5%)  | 59 (35.3%)  |
| COPA (9906) | 36 (21.6%) | 66 (39.5%)  | 68 (40.7%)  |
| ROSE (9906) | 45 (26.9%) | 75 (44.9%)  | 77 (46.1%)  |

## OVERLAP OF P9906 CLUSTERS DEFINED BY EACH METHOD

Each of the three clustering methods in P9906 identified predominantly the same samples even though they shared only 37% of the probe sets (Table S7B). As in shown in Table S8, the overall identity of samples across all three methods is 86.5%. The primary factor responsible for this being lower than ~90% is that HC and ROSE identified a cluster 4, while COPA did not. All 23 of the patients with *TCF3-PBX1* translocations were grouped into cluster 1 by all three methods, as were 19 of the 21 patients with *MLL* translocations. Even though the remaining clusters lacked known underlying translocations they were also very highly conserved.

**Table S8.** Identity of Membership in P9906 Clusters

|                  | Cluster |    |    |    |    |    |    |    |         |
|------------------|---------|----|----|----|----|----|----|----|---------|
|                  | 1       | 2  | 3  | 4  | 5  | 6  | 7  | 8  | Overall |
| HC v COPA        | 19      | 23 | 8  | 0  | 9  | 19 | 88 | 19 | 89.4%   |
| HC v ROSE        | 20      | 23 | 8  | 10 | 9  | 19 | 82 | 22 | 93.2%   |
| COPA v ROSE      | 20      | 23 | 10 | 0  | 10 | 21 | 82 | 20 | 89.9%   |
| HC v COPA v ROSE | 19      | 23 | 8  | 0  | 9  | 19 | 82 | 19 | 86.5%   |

## PROBESETS ASSOCIATED WITH ROSE CLUSTERS (BY MEDIAN RANK ORDER)

The top 100 median rank order probe sets for each ROSE cluster are given. Percentile denotes the ranking of the median cluster rank order relative to the maximum possible. Bold font indicates that these probe sets were also among the 254 outliers selected for clustering. Probe sets marked with an asterisk (including several *PCDH17*, *GAB1*, *GPR110*, *AGAP1* and *CD99*) indicate those for which Affymetrix does not specify a gene, however the probe sets were mapped using the UCSC Genome Browser (<http://genome.ucsc.edu/>) between exons of the indicated genes. Those with a question mark were also lacking Affymetrix gene data, but were mapped within 10 kb of the indicated gene using the UCSC Genome Browser.

**Table S9.** Top 100 Rank Order Genes Defining ROSE Cluster 1 (R1)

| Probeset            | Percent<br>ile | Symbol           | EntrezID     | Cytoband           |
|---------------------|----------------|------------------|--------------|--------------------|
| <b>219463_at</b>    | <b>100</b>     | <b>C20orf103</b> | <b>24141</b> | <b>20p12</b>       |
| <b>205899_at</b>    | <b>100</b>     | <b>CCNA1</b>     | <b>8900</b>  | <b>13q12.3-q13</b> |
| 235479_at           | 100            | CPEB2            | 132864       | 4p15.33            |
| 226939_at           | 100            | CPEB2            | 132864       | 4p15.33            |
| 241706_at           | 100            | CPNE8            | 144402       | 12q12              |
| 236921_at           | 100            | EMB*             | ---          | 5q11.1             |
| 222603_at           | 100            | ERMP1            | 79956        | 9p24               |
| 213147_at           | 100            | HOXA10           | 3206         | 7p15-p14           |
| <b>213150_at</b>    | <b>100</b>     | <b>HOXA10</b>    | <b>3206</b>  | <b>7p15-p14</b>    |
| <b>235521_at</b>    | <b>100</b>     | <b>HOXA3</b>     | <b>3200</b>  | <b>7p15-p14</b>    |
| <b>214651_s_at</b>  | <b>100</b>     | <b>HOXA9</b>     | <b>3205</b>  | <b>7p15-p14</b>    |
| <b>209905_at</b>    | <b>100</b>     | <b>HOXA9</b>     | <b>3205</b>  | <b>7p15-p14</b>    |
| 215163_at           | 100            | IGF2BP2*         | ---          | 3q27.2             |
| 226789_at           | 100            | LOC647121        | 647121       | 1p11.2             |
| <b>202890_at</b>    | <b>100</b>     | <b>MAP7</b>      | <b>9053</b>  | <b>6q23.3</b>      |
| 238498_at           | 100            | MAP7?            | ---          | 6q23.3             |
| <b>204069_at</b>    | <b>100</b>     | <b>MEIS1</b>     | <b>4211</b>  | <b>2p14-p13</b>    |
| <b>242172_at</b>    | <b>100</b>     | <b>MEIS1</b>     | <b>4211</b>  | <b>2p14-p13</b>    |
| <b>1559477_s_at</b> | <b>100</b>     | <b>MEIS1</b>     | <b>4211</b>  | <b>2p14-p13</b>    |
| 219033_at           | 100            | PARP8            | 79668        | 5q11.1             |
| <b>204304_s_at</b>  | <b>100</b>     | <b>PROM1</b>     | <b>8842</b>  | <b>4p15.32</b>     |
| 242414_at           | 100            | QPRT             | 23475        | 16p11.2            |
| 204044_at           | 100            | QPRT             | 23475        | 16p11.2            |
| 1568589_at          | 100            | REEP3*           | ---          | 10q21.3            |
| <b>231899_at</b>    | <b>100</b>     | <b>ZC3H12C</b>   | <b>85463</b> | <b>11q22.3</b>     |
| <b>220416_at</b>    | <b>99.5</b>    | <b>ATP8B4</b>    | <b>79895</b> | <b>15q21.2</b>     |
| 225841_at           | 99.5           | C1orf59          | 113802       | 1p13.3             |
| 227877_at           | 99.5           | C5orf39          | 389289       | 5p12               |
| 212063_at           | 99.5           | CD44             | 960          | 11p13              |
| <b>213844_at</b>    | <b>99.5</b>    | <b>HOXA5</b>     | <b>3202</b>  | <b>7p15-p14</b>    |
| <b>218847_at</b>    | <b>99.5</b>    | <b>IGF2BP2</b>   | <b>10644</b> | <b>3q27.2</b>      |
| 201163_s_at         | 99.5           | IGFBP7           | 3490         | 4q12               |
| <b>201105_at</b>    | <b>99.5</b>    | <b>LGALS1</b>    | <b>3956</b>  | <b>22q13.1</b>     |
| 228412_at           | 99.5           | LOC643072        | 643072       | 2q24.2             |
| 240180_at           | 99.5           | MAP7?            | ---          | 6q23.3             |
| 201153_s_at         | 99.5           | MBNL1            | 4154         | 3q25               |
| 1558111_at          | 99.5           | MBNL1            | 4154         | 3q25               |
| 1556658_a_at        | 99.5           | MBNL1*           | ---          | 3q25.2             |

|                   |             |                  |               |                |
|-------------------|-------------|------------------|---------------|----------------|
| 238558_at         | 99.5        | MBNL1*           | ---           | 3q25.2         |
| 244008_at         | 99.5        | PARP8?           | ---           | 5q11.1         |
| 204082_at         | 99.5        | PBX3             | 5090          | 9q33-q34       |
| 230480_at         | 99.5        | PIWIL4           | 143689        | 11q21          |
| <b>232231_at</b>  | <b>99.5</b> | <b>RUNX2</b>     | <b>860</b>    | <b>6p21</b>    |
| 211769_x_at       | 99.5        | SERINC3          | 10955         | 20q13.1-q13.3  |
| <b>226415_at</b>  | <b>99.5</b> | <b>VAT1L</b>     | <b>57687</b>  | <b>16q23.1</b> |
| 203827_at         | 99.5        | WIPI1            | 55062         | 17q24.2        |
| 242023_at         | 99          | ABHD4            | 63874         | 14q11.2        |
| 202603_at         | 99          | ADAM10*          | ---           | 15q22.1        |
| 215925_s_at       | 99          | CD72             | 971           | 9p13.3         |
| 228365_at         | 99          | CPNE8            | 144402        | 12q12          |
| 214297_at         | 99          | CSPG4            | 1464          | 15q24.2        |
| 200046_at         | 99          | DAD1             | 1603          | 14q11-q12      |
| 227002_at         | 99          | FAM78A           | 286336        | 9q34           |
| 235291_s_at       | 99          | FLJ32255         | 643977        | 5p12           |
| 238712_at         | 99          | FOXP1*           | ---           | 3p14.1         |
| 204417_at         | 99          | GALC             | 2581          | 14q31          |
| 235173_at         | 99          | hCG_1806964      | 401093        | 3q25.1         |
| 201162_at         | 99          | IGFBP7           | 3490          | 4q12           |
| 232544_at         | 99          | IGFBP7*          | ---           | 4q12           |
| 241391_at         | 99          | JMJD1C*          | ---           | 10q21.2        |
| <b>1557534_at</b> | <b>99</b>   | <b>LOC339862</b> | <b>339862</b> | <b>3p24.3</b>  |
| 1556657_at        | 99          | MBNL1*           | ---           | 3q25.2         |
| 219988_s_at       | 99          | RNF220           | 55182         | 1p34.1         |
| 221473_x_at       | 99          | SERINC3          | 10955         | 20q13.1-q13.3  |
| 206506_s_at       | 99          | SUPT3H           | 8464          | 6p21.1-p21.3   |
| 213836_s_at       | 99          | WIPI1            | 55062         | 17q24.2        |
| 218581_at         | 98.5        | ABHD4            | 63874         | 14q11.2        |
| 214895_s_at       | 98.5        | ADAM10           | 102           | 15q2 15q22     |
| 212174_at         | 98.5        | AK2              | 204           | 1p34           |
| 203562_at         | 98.5        | FEZ1             | 9638          | 11q24.2        |
| 235753_at         | 98.5        | HOXA7            | 3204          | 7p15-p14       |
| 213910_at         | 98.5        | IGFBP7           | 3490          | 4q12           |
| 1569041_at        | 98.5        | JMJD1C*          | ---           | 10q21.2        |
| 203836_s_at       | 98.5        | MAP3K5           | 4217          | 6q22.33        |
| 203837_at         | 98.5        | MAP3K5           | 4217          | 6q22.33        |
| 201152_s_at       | 98.5        | MBNL1            | 4154          | 3q25           |
| 235879_at         | 98.5        | MBNL1            | 4154          | 3q25           |
| 225202_at         | 98.5        | RHOBTB3          | 22836         | 5q15           |
| 227719_at         | 98.5        | SMAD9            | 4093          | 13q12-q14      |



|                    |             |                |              |                         |
|--------------------|-------------|----------------|--------------|-------------------------|
| 225959_s_at        | 98.5        | ZNRF1          | 84937        | 16q23.1                 |
| 223382_s_at        | 98.5        | ZNRF1          | 84937        | 16q23.1                 |
| 210783_x_at        | 98          | CLEC11A        | 6320         | 19q13.3                 |
| 232645_at          | 98          | LOC153684      | 153684       | 5p12                    |
| 241681_at          | 98          | MBNL1*         | ---          | 3q25.2                  |
| <b>202976_s_at</b> | <b>98</b>   | <b>RHOBTB3</b> | <b>22836</b> | <b>5q15</b>             |
| 227611_at          | 98          | TARSL2         | 123283       | 15q26.3                 |
| 209825_s_at        | 98          | UCK2           | 7371         | 1q23                    |
| 223383_at          | 98          | ZNRF1          | 84937        | 16q23.1                 |
| 36553_at           | 97.5        | ASMTL          | 8623         | Xp22.3; Yp11.3          |
| 224848_at          | 97.5        | CDK6           | 1021         | 7q21-q22                |
| 213379_at          | 97.5        | COQ2           | 27235        | 4q21.23                 |
| <b>209101_at</b>   | <b>97.5</b> | <b>CTGF</b>    | <b>1490</b>  | <b>6q23.1</b>           |
| 218147_s_at        | 97.5        | GLT8D1         | 55830        | 3p21.1                  |
| <b>218468_s_at</b> | <b>97.5</b> | <b>GREM1</b>   | <b>26585</b> | <b>15q13-q15</b>        |
| 227235_at          | 97.5        | GUCY1A3        | 2982         | 4q31.3-q33 4q31.1-q31.2 |
| 206289_at          | 97.5        | HOXA4          | 3201         | 7p15-p14                |
| 227384_s_at        | 97.5        | LOC727820      | 727820       | 1q21.1                  |
| 203537_at          | 97.5        | PRPSAP2        | 5636         | 17p11.2-p12             |
| 226168_at          | 97.5        | ZFAND2B        | 130617       | 2q35                    |
| 225962_at          | 97.5        | ZNRF1          | 84937        | 16q23.1                 |

**Table S10.** Top 100 Rank Order Genes Defining ROSE Cluster 2 (R2)

| Probeset           | Percentile | Symbol                                              | EntrezID                                    | Cytoband       |
|--------------------|------------|-----------------------------------------------------|---------------------------------------------|----------------|
| <b>227440_at</b>   | <b>100</b> | <b>ANKS1B</b>                                       | <b>56899</b>                                | <b>12q23.1</b> |
| <b>227441_s_at</b> | <b>100</b> | <b>ANKS1B</b>                                       | <b>56899</b>                                | <b>12q23.1</b> |
| <b>227439_at</b>   | <b>100</b> | <b>ANKS1B</b>                                       | <b>56899</b>                                | <b>12q23.1</b> |
| <b>234261_at</b>   | <b>100</b> | <b>ANKS1B*</b>                                      | ---                                         | <b>12q23.1</b> |
| <b>243533_x_at</b> | <b>100</b> | <b>ANKS1B*</b>                                      | ---                                         | <b>12q23.1</b> |
| <b>202206_at</b>   | <b>100</b> | <b>ARL4C</b>                                        | <b>10123</b>                                | <b>2q37.1</b>  |
| 229247_at          | 100        | FBLN7                                               | 129804                                      | 2q13           |
| <b>239657_x_at</b> | <b>100</b> | <b>FOXO6</b>                                        | <b>100132074</b>                            | <b>1p34.1</b>  |
| 202106_at          | 100        | GOLGA3                                              | 2802                                        | 12q24.33       |
| <b>213005_s_at</b> | <b>100</b> | <b>KANK1</b>                                        | <b>23189</b>                                | <b>9p24.3</b>  |
| 207110_at          | 100        | KCNJ12                                              | 3768                                        | 17p11.2        |
| 232289_at          | 100        | KCNJ12                                              | 3768                                        | 17p11.2        |
| <b>208567_s_at</b> | <b>100</b> | <b>KCNJ12 /// LOC100131509<br/>/// LOC100134444</b> | <b>100131509 ///<br/>100134444 /// 3768</b> | <b>17p11.2</b> |
| 213909_at          | 100        | LRRC15                                              | 131578                                      | 3q29           |
| <b>206028_s_at</b> | <b>100</b> | <b>MERTK</b>                                        | <b>10461</b>                                | <b>2q14.1</b>  |

|                    |             |                |               |                       |
|--------------------|-------------|----------------|---------------|-----------------------|
| 211913_s_at        | 100         | MERTK          | 10461         | 2q14.1                |
| 238778_at          | 100         | MPP7           | 143098        | 10p11.23              |
| 212789_at          | 100         | NCAPD3         | 23310         | 11q25                 |
| <b>212148_at</b>   | <b>100</b>  | <b>PBX1</b>    | <b>5087</b>   | <b>1q23</b>           |
| <b>212151_at</b>   | <b>100</b>  | <b>PBX1</b>    | <b>5087</b>   | <b>1q23</b>           |
| <b>205253_at</b>   | <b>100</b>  | <b>PBX1</b>    | <b>5087</b>   | <b>1q23</b>           |
| <b>227949_at</b>   | <b>100</b>  | <b>PHACTR3</b> | <b>116154</b> | <b>20q13.32</b>       |
| 231095_at          | 100         | PITPNC1*       | ---           | 17q24.2               |
| <b>202178_at</b>   | <b>100</b>  | <b>PRKCZ</b>   | <b>5590</b>   | <b>1p36.33-p36.2</b>  |
| 223693_s_at        | 100         | RADIL          | 55698         | 7p22.1                |
| 222513_s_at        | 100         | SORBS1         | 10580         | 10q23.3-q24.1         |
| 225235_at          | 100         | TSPAN17        | 26262         | 5q35.3                |
| <b>225483_at</b>   | <b>100</b>  | <b>VPS26B</b>  | <b>112936</b> | <b>11q25</b>          |
| 224022_x_at        | 100         | WNT16          | 51384         | 7q31                  |
| <b>202207_at</b>   | <b>99.5</b> | <b>ARL4C</b>   | <b>10123</b>  | <b>2q37.1</b>         |
| 202208_s_at        | 99.5        | ARL4C          | 10123         | 2q37.1                |
| 206255_at          | 99.5        | BLK            | 640           | 8p23-p22              |
| <b>223786_at</b>   | <b>99.5</b> | <b>CHST6</b>   | <b>4166</b>   | <b>16q22</b>          |
| <b>205489_at</b>   | <b>99.5</b> | <b>CRYM</b>    | <b>1428</b>   | <b>16p13.11-p12.3</b> |
| 205159_at          | 99.5        | CSF2RB         | 1439          | 22q13.1               |
| 212538_at          | 99.5        | DOCK9          | 23348         | 13q32.3               |
| 229655_at          | 99.5        | FAM19A5        | 25817         | 22q13.32              |
| 206404_at          | 99.5        | FGF9           | 2254          | 13q11-q12             |
| 209558_s_at        | 99.5        | HIP1R          | 9026          | 12q24                 |
| 38340_at           | 99.5        | HIP1R          | 9026          | 12q24                 |
| <b>235911_at</b>   | <b>99.5</b> | <b>K03200*</b> | <b>---</b>    | <b>3q29</b>           |
| <b>204114_at</b>   | <b>99.5</b> | <b>NID2</b>    | <b>22795</b>  | <b>14q21-q22</b>      |
| 1562235_s_at       | 99.5        | PBX1*          | ---           | 1q23.3                |
| 229414_at          | 99.5        | PITPNC1        | 26207         | 17q24.2               |
| <b>231040_at</b>   | <b>99.5</b> | <b>RORB?</b>   | <b>---</b>    | <b>9q21.13</b>        |
| <b>46665_at</b>    | <b>99.5</b> | <b>SEMA4C</b>  | <b>54910</b>  | <b>2q11.2</b>         |
| <b>206181_at</b>   | <b>99.5</b> | <b>SLAMF1</b>  | <b>6504</b>   | <b>1q22-q23</b>       |
| 239427_at          | 99.5        | SLAMF1?        | ---           | 1q23.3                |
| 203940_s_at        | 99.5        | VASH1          | 22846         | 14q24.3               |
| 230306_at          | 99.5        | VPS26B         | 112936        | 11q25                 |
| 221113_s_at        | 99.5        | WNT16          | 51384         | 7q31                  |
| 226233_at          | 99          | B3GALNT2       | 148789        | 1q42.3                |
| 201615_x_at        | 99          | CALD1          | 800           | 7q33                  |
| 209570_s_at        | 99          | D4S234E        | 27065         | 4p16.3                |
| 229892_at          | 99          | EP400NL        | 347918        | 12q24.33              |
| <b>206070_s_at</b> | <b>99</b>   | <b>EPHA3</b>   | <b>2042</b>   | <b>3p11.2</b>         |
| 237094_at          | 99          | FAM19A5        | 25817         | 22q13.32              |
| 227676_at          | 99          | FAM3D          | 131177        | 3p14.2                |
| <b>201579_at</b>   | <b>99</b>   | <b>FAT1</b>    | <b>2195</b>   | <b>4q35</b>           |
| 204225_at          | 99          | HDAC4          | 9759          | 2q37.3                |
| 1566030_at         | 99          | PHACTR3*       | ---           | 20q13.32              |
| <b>242385_at</b>   | <b>99</b>   | <b>RORB</b>    | <b>6096</b>   | <b>9q22</b>           |
| 221669_s_at        | 98.5        | ACAD8          | 27034         | 11q25                 |

|                    |             |                 |               |                      |
|--------------------|-------------|-----------------|---------------|----------------------|
| 205083_at          | 98.5        | AOX1            | 316           | 2q33                 |
| 225313_at          | 98.5        | C20orf177       | 63939         | 20q13.2-q13.33       |
| 201616_s_at        | 98.5        | CALD1           | 800           | 7q33                 |
| 209569_x_at        | 98.5        | D4S234E         | 27065         | 4p16.3               |
| 212371_at          | 98.5        | FAM152A         | 51029         | 1q44                 |
| 229770_at          | 98.5        | GLT1D1          | 144423        | 12q24.32             |
| 226949_at          | 98.5        | GOLGA3          | 2802          | 12q24.33             |
| 204202_at          | 98.5        | IQCE            | 23288         | 7p22.2               |
| 213358_at          | 98.5        | KIAA0802        | 23255         | 18p11.22             |
| <b>210150_s_at</b> | <b>98.5</b> | <b>LAMA5</b>    | <b>3911</b>   | <b>20q13.2-q13.3</b> |
| 238451_at          | 98.5        | MPP7            | 143098        | 10p11.23             |
| 219155_at          | 98.5        | PITPNC1         | 26207         | 17q24.2              |
| 215807_s_at        | 98.5        | PLXNB1          | 5364          | 3p21.31              |
| 225728_at          | 98.5        | SORBS2          | 8470          | 4q35.1               |
| 217650_x_at        | 98.5        | ST3GAL2         | 6483          | 16q22.1              |
| 1554340_a_at       | 98          | C1orf187        | 374946        | 1p36.22              |
| <b>212077_at</b>   | <b>98</b>   | <b>CALD1</b>    | <b>800</b>    | <b>7q33</b>          |
| 220373_at          | 98          | DCHS2           | 54798         | 4q32.1               |
| 232204_at          | 98          | EBF1            | 1879          | 5q34                 |
| 201718_s_at        | 98          | EPB41L2         | 2037          | 6q23                 |
| 201719_s_at        | 98          | EPB41L2         | 2037          | 6q23                 |
| <b>231455_at</b>   | <b>98</b>   | <b>FLJ42418</b> | <b>400941</b> | <b>2p25.2</b>        |
| 219271_at          | 98          | GALNT14         | 79623         | 2p23.1               |
| 214265_at          | 98          | ITGA8           | 8516          | 10p13                |
| <b>235666_at</b>   | <b>98</b>   | <b>ITGA8?</b>   | <b>---</b>    | <b>10p13</b>         |
| 209760_at          | 98          | KIAA0922        | 23240         | 4q31.3               |
| 226796_at          | 98          | LOC116236       | 116236        | 17q11.2              |
| <b>228262_at</b>   | <b>98</b>   | <b>MAP7D2</b>   | <b>256714</b> | <b>Xp22.12</b>       |
| 212845_at          | 98          | SAMD4A          | 23034         | 14q22.2              |
| 202796_at          | 98          | SYNPO           | 11346         | 5q33.1               |
| 222752_s_at        | 98          | TMEM206         | 55248         | 1q32.3               |
| 227733_at          | 98          | TMEM63C         | 57156         | 14q24.3              |
| 242957_at          | 98          | VWCE            | 220001        | 11q12.2              |
| 224516_s_at        | 97.4        | CXXC5           | 51523         | 5q31.3               |
| 220911_s_at        | 97.4        | KIAA1305        | 57523         | 14q12                |
| 213136_at          | 97.4        | PTPN2           | 5771          | 18p11.3-p11.2        |
| 202478_at          | 97.4        | TRIB2           | 28951         | 2p25.1-p24.3         |

**Table S11.** Top 100 Rank Order Genes Defining ROSE Cluster 3 (R3)

| Probeset         | Percentile | Symbol         | EntrezID   | Cytoband      |
|------------------|------------|----------------|------------|---------------|
| 244463_at        | 100        | ADAM23         | 8745       | 2q33          |
| 240143_at        | 100        | ADAM23*        | ---        | 2q33.3        |
| <b>213808_at</b> | <b>100</b> | <b>ADAM23*</b> | <b>---</b> | <b>2q33.3</b> |
| 204129_at        | 100        | BCL9           | 607        | 1q21          |
| 213050_at        | 100        | COBL           | 23242      | 7p12.1        |

|                    |             |               |              |                      |
|--------------------|-------------|---------------|--------------|----------------------|
| 205659_at          | 100         | HDAC9         | 9734         | 7p21.1               |
| 230968_at          | 100         | HDAC9?        | ---          | 7p21.1               |
| 217869_at          | 100         | HSD17B12      | 51144        | 11p11.2              |
| 1557252_at         | 100         | HSD17B12*     | ---          | 11p11.2              |
| 216028_at          | 100         | HSD17B12?     | ---          | 11p11.2              |
| 242616_at          | 100         | HSD17B12?     | ---          | 11p11.2              |
| <b>230128_at</b>   | <b>100</b>  | <b>IGL@</b>   | <b>3535</b>  | <b>22q11.1-q11.2</b> |
| 204686_at          | 100         | IRS1          | 3667         | 2q36                 |
| 206765_at          | 100         | KCNJ2         | 3759         | 17q23.1-q24.2        |
| <b>203726_s_at</b> | <b>100</b>  | <b>LAMA3</b>  | <b>3909</b>  | <b>18q11.2</b>       |
| 224823_at          | 100         | MYLK          | 4638         | 3q21                 |
| 202555_s_at        | 100         | MYLK          | 4638         | 3q21                 |
| 216012_at          | 100         | PDE4D*        | ---          | 5q12.1               |
| 205632_s_at        | 100         | PIP5K1B       | 8395         | 9q13                 |
| 204469_at          | 100         | PTPRZ1        | 5803         | 7q31.3               |
| 212104_s_at        | 100         | RBM9          | 23543        | 22q13.1              |
| 213243_at          | 100         | VPS13B        | 157680       | 8q22.2               |
| 226325_at          | 99.5        | ADSSL1        | 122622       | 14q32.33             |
| 1552496_a_at       | 99.5        | COBL          | 23242        | 7p12.1               |
| 219518_s_at        | 99.5        | ELL3          | 80237        | 15q15.3              |
| <b>231513_at</b>   | <b>99.5</b> | <b>KCNJ2*</b> | <b>---</b>   | <b>17q24.3</b>       |
| 221584_s_at        | 99.5        | KCNMA1        | 3778         | 10q22.3              |
| 213568_at          | 99.5        | OSR2          | 116039       | 8q22.2               |
| 202780_at          | 99.5        | OXCT1         | 5019         | 5p13.1               |
| 239832_at          | 99.5        | PIP5K1B*      | ---          | 9q21.11              |
| 213309_at          | 99.5        | PLCL2         | 23228        | 3p24.3               |
| 216218_s_at        | 99.5        | PLCL2         | 23228        | 3p24.3               |
| 203020_at          | 99.5        | RABGAP1L      | 9910         | 1q24                 |
| 203097_s_at        | 99.5        | RAPGEF2       | 9693         | 4q32.1               |
| 218137_s_at        | 99.5        | SMAP1         | 60682        | 6q13                 |
| 223246_s_at        | 99.5        | STRBP         | 55342        | 9q33.3               |
| <b>225496_s_at</b> | <b>99.5</b> | <b>SYTL2</b>  | <b>54843</b> | <b>11q14</b>         |
| 1554803_s_at       | 99.5        | TRIM72        | 493829       | 16p11.2              |
| 206046_at          | 99          | ADAM23        | 8745         | 2q33                 |
| <b>203865_s_at</b> | <b>99</b>   | <b>ADARB1</b> | <b>104</b>   | <b>21q22.3</b>       |
| 206167_s_at        | 99          | ARHGAP6       | 395          | Xp22.3               |
| 219517_at          | 99          | ELL3          | 80237        | 15q15.3              |
| 45572_s_at         | 99          | GGA1          | 26088        | 22q13.31             |
| 204891_s_at        | 99          | LCK           | 3932         | 1p34.3               |
| 204890_s_at        | 99          | LCK           | 3932         | 1p34.3               |
| 222322_at          | 99          | PDE4D*        | ---          | 5q12.1               |

|                    |             |                        |                    |                  |
|--------------------|-------------|------------------------|--------------------|------------------|
| 203038_at          | 99          | PTPRK                  | 5796               | 6q22.2-q22.3     |
| 213982_s_at        | 99          | RABGAP1L               | 9910               | 1q24             |
| 238894_at          | 99          | RABGAP1L*              | ---                | 1q25.1           |
| 203096_s_at        | 99          | RAPGEF2                | 9693               | 4q32.1           |
| 215992_s_at        | 99          | RAPGEF2                | 9693               | 4q32.1           |
| 232739_at          | 99          | SPIB                   | 6689               | 19q13.3-q13.4    |
| 220613_s_at        | 99          | SYTL2                  | 54843              | 11q14            |
| 212350_at          | 99          | TBC1D1                 | 23216              | 4p14             |
| 203588_s_at        | 99          | TFDP2                  | 7029               | 3q23             |
| 219520_s_at        | 99          | WWC3                   | 55841              | Xp22.32          |
| 227173_s_at        | 98.5        | BACH2                  | 60468              | 6q15             |
| 241871_at          | 98.5        | CAMK4                  | 814                | 5q21.3           |
| 206806_at          | 98.5        | DGKI                   | 9162               | 7q32.3-q33       |
| 205425_at          | 98.5        | HIP1                   | 3092               | 7q11.23          |
| 215946_x_at        | 98.5        | IGLL3                  | 91353              | 22q11.2 22q11.23 |
| 225963_at          | 98.5        | KLHDC5                 | 57542              | 12p11.22         |
| 234608_at          | 98.5        | LAMA3                  | 3909               | 18q11.2          |
| 217140_s_at        | 98.5        | LOC100133724 /// VDAC1 | 100133724 /// 7416 | 5q31             |
| 213502_x_at        | 98.5        | LOC91316               | 91316              | 22q11.23         |
| 205826_at          | 98.5        | MYOM2                  | 9172               | 8p23.3           |
| 244387_at          | 98.5        | PDE4D*                 | ---                | 5q12.1           |
| 1565762_at         | 98.5        | RABGAP1L*              | ---                | 1q25.1           |
| 205590_at          | 98.5        | RASGRP1                | 10125              | 15q14            |
| <b>232914_s_at</b> | <b>98.5</b> | <b>SYTL2</b>           | <b>54843</b>       | <b>11q14</b>     |
| 244043_at          | 98.5        | TFDP2?                 | ---                | 3q23             |
| 223750_s_at        | 98.5        | TLR10                  | 81793              | 4p14             |
| 212038_s_at        | 98.5        | VDAC1                  | 7416               | 5q31             |
| 243734_x_at        | 98.5        | VWC2?                  | ---                | 7p12.2           |
| 243526_at          | 98.5        | WDR86                  | 349136             | 7q36.1           |
| 234033_at          | 98          | ---                    | ---                | 4q32.1           |
| 203263_s_at        | 98          | ARHGEF9                | 23229              | Xq11.1           |
| 213238_at          | 98          | ATP10D                 | 57205              | 4p12             |
| 221234_s_at        | 98          | BACH2                  | 60468              | 6q15             |
| 218285_s_at        | 98          | BDH2                   | 56898              | 4q24             |
| 235952_at          | 98          | DGKH-1*                | ---                | 13q14.11         |
| 234912_at          | 98          | DKFZP547L112           | 81787              | 15q11.2          |
| 213186_at          | 98          | DZIP3                  | 9666               | 3q13.13          |
| 50277_at           | 98          | GGA1                   | 26088              | 22q13.31         |
| 242952_at          | 98          | HDAC9*                 | ---                | 7p21.1           |
| 214836_x_at        | 98          | IGKC                   | 3514               | 2p12             |
| 237625_s_at        | 98          | IGKC*                  | ---                | 2p12             |

|             |      |           |        |                 |
|-------------|------|-----------|--------|-----------------|
| 225961_at   | 98   | KLHDC5    | 57542  | 12p11.22        |
| 230551_at   | 98   | KSR2      | 283455 | 12q24.22-q24.23 |
| 205386_s_at | 98   | MDM2      | 4193   | 12q14.3-q15     |
| 222350_at   | 97.5 | BTBD3     | 22903  | 20p12.2         |
| 229715_at   | 97.5 | BTBD6     | 90135  | 14q32           |
| 202946_s_at | 97.5 | IGKC      | 3514   | 2p12            |
| 225389_at   | 97.5 | KCNJ11?   | ---    | 11p15.1         |
| 214669_x_at | 97.5 | LOC729082 | 729082 | 15q15.1         |
| 225332_at   | 97.5 | NBPF1*    | ---    | 1q21.1          |
| 213273_at   | 97.5 | ODZ4      | 26011  | 11q14.1         |
| 235802_at   | 97.5 | PLD4      | 122618 | 14q32.33        |
| 218526_s_at | 97.5 | RANGRF    | 29098  | 17p13           |
| 230597_at   | 97.5 | SLC7A3    | 84889  | Xq13.1          |

**Table S12.** Top 100 Rank Order Genes Defining ROSE Cluster 4 (R4)

| Probeset    | Rank   | Symbol                  | EntrezID           | Cytoband             |
|-------------|--------|-------------------------|--------------------|----------------------|
| 210356_x_at | 100.0% | MS4A1                   | 931                | 11q12                |
| 217418_x_at | 100.0% | MS4A1                   | 931                | 11q12                |
| 205401_at   | 99.5%  | AGPS                    | 8540               | 2q31.2               |
| 228592_at   | 99.5%  | MS4A1                   | 931                | 11q12                |
| 241774_at   | 99.5%  | ---                     | ---                | ---                  |
| 218941_at   | 99.5%  | FBXW2                   | 26190              | 9q34                 |
| 225114_at   | 99.0%  | AGPS                    | 8540               | 2q31.2               |
| 202123_s_at | 99.0%  | ABL1                    | 25                 | 9q34.1               |
| 203476_at   | 99.0%  | TPBG                    | 7162               | 6q14-q15             |
| 214783_s_at | 98.5%  | ANXA11                  | 311                | 10q23                |
| 202947_s_at | 98.5%  | GYPC                    | 2995               | 2q14-q21             |
| 225833_at   | 98.5%  | DAGLB                   | 221955             | 7p22.1               |
| 225073_at   | 98.5%  | PPLN1                   | 51535              | 12q12                |
| 212730_at   | 98.5%  | SYNM                    | 23336              | 15q26.3              |
| 227846_at   | 98.5%  | GPR176                  | 11245              | 15q14-q15.1          |
| 223991_s_at | 98.5%  | GALNT2 /// LOC100132910 | 100132910 /// 2590 | 18q12.2 /// 1q41-q42 |
| 208195_at   | 98.0%  | TTN                     | 7273               | 2q31                 |
| 233713_at   | 98.0%  | ---                     | ---                | ---                  |
| 217788_s_at | 98.0%  | GALNT2                  | 2590               | 1q41-q42             |
| 224830_at   | 98.0%  | NUDT21                  | 11051              | 16q13                |

|              |       |                                                                 |                                                             |                                                                    |
|--------------|-------|-----------------------------------------------------------------|-------------------------------------------------------------|--------------------------------------------------------------------|
| 226832_at    | 98.0% | ---                                                             | ---                                                         | ---                                                                |
| 202273_at    | 98.0% | PDGFRB                                                          | 5159                                                        | 5q31-q32                                                           |
| 225376_at    | 98.0% | C20orf11                                                        | 54994                                                       | 20q13.33                                                           |
| 225281_at    | 98.0% | C3orf17                                                         | 25871                                                       | 3q13.2                                                             |
| 201096_s_at  | 98.0% | ARF4                                                            | 378                                                         | 3p21.2-p21.1                                                       |
| 203948_s_at  | 97.5% | MPO                                                             | 4353                                                        | 17q23.1                                                            |
| 1558017_s_at | 97.5% | ---                                                             | ---                                                         | ---                                                                |
| 203949_at    | 97.5% | MPO                                                             | 4353                                                        | 17q23.1                                                            |
| 1555392_at   | 97.5% | LOC100128868                                                    | 100128868                                                   | 7q31.2                                                             |
| 227541_at    | 97.5% | WDR20                                                           | 91833                                                       | 14q32.31                                                           |
| 1567458_s_at | 97.5% | RAC1                                                            | 5879                                                        | 7p22                                                               |
| 213920_at    | 97.5% | CUX2                                                            | 23316                                                       | 12q24.11-q24.12                                                    |
| 224734_at    | 97.5% | HMGB1                                                           | 3146                                                        | 13q12                                                              |
| 206673_at    | 97.5% | GPR176                                                          | 11245                                                       | 15q14-q15.1                                                        |
| 224636_at    | 97.5% | ZFP91                                                           | 80829                                                       | 11q12                                                              |
| 235232_at    | 97.5% | GMEB1                                                           | 10691                                                       | 1p35.3                                                             |
| 208762_at    | 97.5% | SUMO1                                                           | 7341                                                        | 2q33                                                               |
| 36612_at     | 97.0% | FAM168A                                                         | 23201                                                       | 11q13.4                                                            |
| 225240_s_at  | 97.0% | MSI2                                                            | 124540                                                      | 17q22                                                              |
| 336_at       | 97.0% | TBXA2R                                                          | 6915                                                        | 19p13.3                                                            |
| 223101_s_at  | 97.0% | ARPC5L                                                          | 81873                                                       | 9q33.3                                                             |
| 209049_s_at  | 97.0% | ZMYND8                                                          | 23613                                                       | 20q13.12                                                           |
| 217940_s_at  | 97.0% | CARKD                                                           | 55739                                                       | 13q34                                                              |
| 216508_x_at  | 97.0% | CTCFL /// HMGB1 ///<br>HMGB1L1 /// HMGB1L10 ///<br>LOC100132863 | 100130561 ///<br>100132863 /// 10357<br>/// 140690 /// 3146 | 13q12 ///<br>20q13.31 ///<br>20q13.32 ///<br>22q12.1 ///<br>9q33.2 |
| 201266_at    | 97.0% | TXNRD1                                                          | 7296                                                        | 12q23-q24.1                                                        |
| 212286_at    | 97.0% | ANKRD12                                                         | 23253                                                       | 18p11.22                                                           |
| 200618_at    | 97.0% | LASP1                                                           | 3927                                                        | 17q11-q21.3                                                        |
| 227577_at    | 97.0% | EXOC8                                                           | 149371                                                      | 1q42.2                                                             |
| 203068_at    | 97.0% | KLHL21                                                          | 9903                                                        | 1p36.31                                                            |
| 217787_s_at  | 97.0% | GALNT2                                                          | 2590                                                        | 1q41-q42                                                           |
| 239930_at    | 97.0% | GALNT2                                                          | 2590                                                        | 1q41-q42                                                           |

|              |       |                      |                  |                     |
|--------------|-------|----------------------|------------------|---------------------|
| 227700_x_at  | 97.0% | ATAD3A               | 55210            | 1p36.33             |
| 225694_at    | 97.0% | CRKRS                | 51755            | 17q12               |
| 202514_at    | 97.0% | DLG1                 | 1739             | 3q29                |
| 226115_at    | 97.0% | AHCTF1               | 25909            | 1q44                |
| 1562948_at   | 97.0% | ---                  | ---              | ---                 |
| 225456_at    | 97.0% | MED1                 | 5469             | 17q12-q21.1         |
| 208821_at    | 97.0% | SNRPB                | 6628             | 20p13               |
| 212204_at    | 97.0% | TMEM87A              | 25963            | 15q15.1             |
| 231124_x_at  | 97.0% | LY9                  | 4063             | 1q21.3-q22          |
| 218118_s_at  | 97.0% | TIMM23               | 10431            | 10q11.21-q11.23     |
| 212272_at    | 96.5% | LPIN1                | 23175            | 2p25.1              |
| 220684_at    | 96.5% | TBX21                | 30009            | 17q21.32            |
| 216836_s_at  | 96.5% | ERBB2                | 2064             | 17q11.2-q12 17q21.1 |
| 232521_at    | 96.5% | PCSK7                | 9159             | 11q23-q24           |
| 205839_s_at  | 96.5% | BZRAP1               | 9256             | 17q22-q23           |
| 218031_s_at  | 96.5% | FOXN3                | 1112             | 14q31.3             |
| 226640_at    | 96.5% | DAGLB                | 221955           | 7p22.1              |
| 213514_s_at  | 96.5% | DIAPH1               | 1729             | 5q31                |
| 225494_at    | 96.5% | DYNLL2               | 140735           | 17q22               |
| 213222_at    | 96.5% | PLCB1                | 23236            | 20p12               |
| 212594_at    | 96.5% | PDCD4                | 27250            | 10q24               |
| 201133_s_at  | 96.5% | PJA2                 | 9867             | 5q21.3              |
| 235463_s_at  | 96.5% | LASS6                | 253782           | 2q24.3              |
| 200047_s_at  | 96.5% | YY1                  | 7528             | 14q                 |
| 201407_s_at  | 96.5% | PPP1CB               | 5500             | 2p23                |
| 1552931_a_at | 96.5% | PDE8A                | 5151             | 15q25.3             |
| 242467_at    | 96.5% | ---                  | ---              | ---                 |
| 213860_x_at  | 96.5% | CSNK1A1              | 1452             | 5q32                |
| 212927_at    | 96.5% | SMC5                 | 23137            | 9q21.11             |
| 227237_x_at  | 96.5% | ATAD3B /// LOC732419 | 732419 /// 83858 | 1p36.33             |



|              |       |          |        |                 |
|--------------|-------|----------|--------|-----------------|
| 200775_s_at  | 96.5% | HNRNPK   | 3190   | 9q21.32-q21.33  |
| 210203_at    | 96.5% | CNOT4    | 4850   | 7q22-qter       |
| 214352_s_at  | 96.5% | KRAS     | 3845   | 12p12.1         |
| 1555772_a_at | 96.5% | CDC25A   | 993    | 3p21            |
| 212696_s_at  | 96.5% | RNF4     | 6047   | 4p16.3          |
| 235233_s_at  | 96.5% | GMEB1    | 10691  | 1p35.3          |
| 225535_s_at  | 96.5% | TIMM23   | 10431  | 10q11.21-q11.23 |
| 1555762_s_at | 96.5% | RBM15    | 64783  | 1p13            |
| 204735_at    | 96.5% | PDE4A    | 5141   | 19p13.2         |
| 228599_at    | 96.0% | MS4A1    | 931    | 11q12           |
| 212511_at    | 96.0% | PICALM   | 8301   | 11q14           |
| 207681_at    | 96.0% | CXCR3    | 2833   | Xq13            |
| 224912_at    | 96.0% | TTC7A    | 57217  | 2p21            |
| 218447_at    | 96.0% | C16orf61 | 56942  | 16q23.2         |
| 204206_at    | 96.0% | MNT      | 4335   | 17p13.3         |
| 227433_at    | 96.0% | KIAA2018 | 205717 | 3q13.2          |
| 224617_at    | 96.0% | ROD1     | 9991   | 9q32            |
| 1560339_s_at | 96.0% | NAP1L4   | 4676   | 11p15.5         |
| 201015_s_at  | 96.0% | JUP      | 3728   | 17q21           |

**Table S13.** Top 100 Rank Order Genes Defining ROSE Cluster 5 (R5)

| Probeset         | Percentile | Symbol       | EntrezID     | Cytoband       |
|------------------|------------|--------------|--------------|----------------|
| 202804_at        | 100        | ABCC1        | 4363         | 16p13.1        |
| 204638_at        | 100        | ACP5         | 54           | 19p13.3-p13.2  |
| 205423_at        | 100        | AP1B1        | 162          | 22q12 22q12.2  |
| <b>212062_at</b> | <b>100</b> | <b>ATP9A</b> | <b>10079</b> | <b>20q13.2</b> |
| 216129_at        | 100        | ATP9A        | 10079        | 20q13.2        |
| 236226_at        | 100        | BTLA         | 151888       | 3q13.2         |
| 209498_at        | 100        | CEACAM1      | 634          | 19q13.2        |
| 222786_at        | 100        | CHST12       | 55501        | 7p22           |
| 218927_s_at      | 100        | CHST12       | 55501        | 7p22           |
| 219500_at        | 100        | CLCF1        | 23529        | 11q13.3        |
| 1556385_at       | 100        | CLCF1*       | ---          | 11q13.1        |
| 201445_at        | 100        | CNN3         | 1266         | 1p22-p21       |
| <b>228297_at</b> | <b>100</b> | <b>CNN3*</b> | ---          | <b>1p21.3</b>  |
| 228585_at        | 100        | ENTPD1       | 953          | 10q24          |
| 1554903_at       | 100        | FRMD8        | 83786        | 11q13          |

|                               |             |                    |                 |                         |
|-------------------------------|-------------|--------------------|-----------------|-------------------------|
| 1554905_x_at                  | 100         | FRMD8              | 83786           | 11q13                   |
| 227964_at                     | 100         | FRMD8              | 83786           | 11q13                   |
| 230788_at                     | 100         | GCNT2              | 2651            | 6p24.2                  |
| 202032_s_at                   | 100         | MAN2A2             | 4122            | 15q26.1                 |
| 209703_x_at                   | 100         | METTL7A            | 25840           | 12q13.13                |
| 226531_at                     | 100         | Orai1              | 84876           | 12q24.31                |
| 60471_at                      | 100         | RIN3               | 79890           | 14q32.12                |
| 207735_at                     | 100         | RNF125             | 54941           | 18q12.1                 |
| <b>229661_at</b>              | <b>100</b>  | <b>SALL4</b>       | <b>57167</b>    | <b>20q13.13-q13.2</b>   |
| 222088_s_at                   | 100         | SLC2A14 /// SLC2A3 | 144195 /// 6515 | 12p13.3 ///<br>12p13.31 |
| 202498_s_at                   | 100         | SLC2A3             | 6515            | 12p13.3                 |
| 202499_s_at                   | 100         | SLC2A3             | 6515            | 12p13.3                 |
| 213083_at                     | 100         | SLC35D2            | 11046           | 9q22.32                 |
| 215447_at                     | 100         | TFPI               | 7035            | 2q32                    |
| 231775_at                     | 100         | TNFRSF10A          | 8797            | 8p21                    |
| 227595_at                     | 100         | ZMYM6              | 9204            | 1p34.2                  |
| 243121_x_at                   | 99.5        | ---                | ---             | 19q13.41                |
| 223646_s_at                   | 99.5        | CYorf15B           | 84663           | Yq11.222                |
| 203139_at                     | 99.5        | DAPK1              | 1612            | 9q34.1                  |
| 211214_s_at                   | 99.5        | DAPK1              | 1612            | 9q34.1                  |
| 223306_at                     | 99.5        | EBPL               | 84650           | 13q12-q13               |
| 209474_s_at                   | 99.5        | ENTPD1             | 953             | 10q24                   |
| 209473_at                     | 99.5        | ENTPD1             | 953             | 10q24                   |
| 229280_s_at                   | 99.5        | FLJ22536           | 401237          | 6p22.3                  |
| 228188_at                     | 99.5        | FOSL2              | 2355            | 2p23.3                  |
| AFFX-<br>HUMGAPDH/M33197_5_at | 99.5        | GAPDH              | 2597            | 12p13                   |
| 204689_at                     | 99.5        | HHEX               | 3087            | 10q23.33                |
| 1552623_at                    | 99.5        | HSH2D              | 84941           | 19p13.11                |
| 207761_s_at                   | 99.5        | METTL7A            | 25840           | 12q13.13                |
| 207132_x_at                   | 99.5        | PFDN5              | 5204            | 12q12                   |
| 1557948_at                    | 99.5        | PHLDB3             | 653583          | 19q13.31                |
| <b>213362_at</b>              | <b>99.5</b> | <b>PTPRD</b>       | <b>5789</b>     | <b>9p23-p24.3</b>       |
| 227983_at                     | 99.5        | RILPL2             | 196383          | 12q24.31                |
| 219457_s_at                   | 99.5        | RIN3               | 79890           | 14q32.12                |
| 211474_s_at                   | 99.5        | SERPINB6           | 5269            | 6p25                    |
| 223196_s_at                   | 99.5        | SESN2              | 83667           | 1p35.3                  |
| 216236_s_at                   | 99.5        | SLC2A14 /// SLC2A3 | 144195 /// 6515 | 12p13.3 ///<br>12p13.31 |
| 202497_x_at                   | 99.5        | SLC2A3             | 6515            | 12p13.3                 |

|                    |             |                    |                 |                              |
|--------------------|-------------|--------------------|-----------------|------------------------------|
| 227594_at          | 99.5        | ZMYM6              | 9204            | 1p34.2                       |
| 202805_s_at        | 99          | ABCC1              | 4363            | 16p13.1                      |
| 213346_at          | 99          | C13orf27           | 93081           | 13q33.1                      |
| 223527_s_at        | 99          | CDADC1             | 81602           | 13q14.2                      |
| 213060_s_at        | 99          | CHI3L2             | 1117            | 1p13.3                       |
| 203277_at          | 99          | DFFA               | 1676            | 1p36.3-p36.2                 |
| 208887_at          | 99          | EIF3G              | 8666            | 19p13.2                      |
| 219016_at          | 99          | FASTKD5            | 60493           | 20p13                        |
| 218034_at          | 99          | FIS1               | 51024           | 7q22.1                       |
| 225163_at          | 99          | FRMD4A             | 55691           | 10p13                        |
| 239606_at          | 99          | GCNT2A*            | ---             | 6p24.2                       |
| 230348_at          | 99          | LATS2              | 26524           | 13q11-q12                    |
| 209332_s_at        | 99          | MAX                | 4149            | 14q23                        |
| 227379_at          | 99          | MBOAT1             | 154141          | 6p22.3                       |
| 217980_s_at        | 99          | MRPL16             | 54948           | 11q12-q13.1                  |
| 238082_at          | 99          | PLEKHA2*           | ---             | 8p11.23                      |
| 232473_at          | 99          | PRPF18             | 8559            | 10p13                        |
| 220330_s_at        | 99          | SAMSN1             | 64092           | 21q11                        |
| 223917_s_at        | 99          | SLC39A3            | 29985           | 19p13.3                      |
| 219257_s_at        | 99          | SPHK1              | 8877            | 17q25.2                      |
| 203544_s_at        | 99          | STAM               | 8027            | 10p14-p13                    |
| <b>213258_at</b>   | <b>99</b>   | <b>TFPI</b>        | <b>7035</b>     | <b>2q32</b>                  |
| <b>210664_s_at</b> | <b>99</b>   | <b>TFPI</b>        | <b>7035</b>     | <b>2q32</b>                  |
| <b>210665_at</b>   | <b>99</b>   | <b>TFPI</b>        | <b>7035</b>     | <b>2q32</b>                  |
| 201379_s_at        | 99          | TPD52L2            | 7165            | 20q13.2-q13.3                |
| 212481_s_at        | 99          | TPM4               | 7171            | 19p13.1                      |
| 235094_at          | 99          | TPM4*              | ---             | 19p13.2                      |
| 212923_s_at        | 98.5        | C6orf145           | 221749          | 6p25.2                       |
| 206120_at          | 98.5        | CD33               | 945             | 19q13.3                      |
| 1559916_a_at       | 98.5        | CHST12*            | ---             | 7p22.2                       |
| 1554464_a_at       | 98.5        | CRTAP              | 10491           | 3p22.3                       |
| 209774_x_at        | 98.5        | CXCL2              | 2920            | 4q21                         |
| 225168_at          | 98.5        | FRMD4A             | 55691           | 10p13                        |
| 213453_x_at        | 98.5        | GAPDH              | 2597            | 12p13                        |
| <b>209604_s_at</b> | <b>98.5</b> | <b>GATA3</b>       | <b>2625</b>     | <b>10p15</b>                 |
| 209602_s_at        | 98.5        | GATA3              | 2625            | 10p15                        |
| 204000_at          | 98.5        | GNB5               | 10681           | 15q21.2                      |
| 233877_at          | 98.5        | GOLIM4*            | ---             | 3q26.2                       |
| 203395_s_at        | 98.5        | HES1               | 3280            | 3q28-q29                     |
| 214950_at          | 98.5        | IL9R /// LOC729486 | 3581 /// 729486 | 16p13.3 ///<br>Xq28 and Yq12 |
| 213923_at          | 98.5        | RAP2B              | 5912            | 3q25.2                       |

|             |      |         |        |                |
|-------------|------|---------|--------|----------------|
| 238091_at   | 98.5 | RPH3AL* | ---    | 17p13.3        |
| 236501_at   | 98.5 | SALL4   | 57167  | 20q13.13-q13.2 |
| 223195_s_at | 98.5 | SESN2   | 83667  | 1p35.3         |
| 227518_at   | 98.5 | SLC35E1 | 79939  | 19p13.11       |
| 243981_at   | 98.5 | STK4    | 6789   | 20q11.2-q13.2  |
| 212369_at   | 98.5 | ZNF384  | 171017 | 12p12          |

**Table S14.** Top 100 Rank Order Genes Defining ROSE Cluster 6 (R6)

| Probeset            | Percentile  | Symbol                     | EntrezID                 | Cytoband             |
|---------------------|-------------|----------------------------|--------------------------|----------------------|
| <b>242457_at</b>    | <b>100</b>  | ---                        | ---                      | <b>5q21.1</b>        |
| <b>204066_s_at</b>  | <b>100</b>  | <b>AGAP1</b>               | <b>116987</b>            | <b>2q37</b>          |
| 233038_at           | 100         | AGAP1*                     | ---                      | 2q37.2               |
| <b>233225_at</b>    | <b>100</b>  | <b>AGAP1*</b>              | ---                      | <b>2q37.2</b>        |
| 235968_at           | 100         | AGAP1*                     | ---                      | 2q37.2               |
| <b>240758_at</b>    | <b>100</b>  | <b>AGAP1*</b>              | ---                      | <b>2q37.2</b>        |
| 228240_at           | 100         | AGAP1?                     | ---                      | 2q37.2               |
| <b>206756_at</b>    | <b>100</b>  | <b>CHST7</b>               | <b>56548</b>             | <b>Xp11.23</b>       |
| 200614_at           | 100         | CLTC                       | 1213                     | 17q11-qter           |
| <b>231166_at</b>    | <b>100</b>  | <b>GPR155</b>              | <b>151556</b>            | <b>2q31.1</b>        |
| <b>228863_at</b>    | <b>100</b>  | <b>PCDH17</b>              | <b>27253</b>             | <b>13q21.1</b>       |
| <b>227289_at</b>    | <b>100</b>  | <b>PCDH17</b>              | <b>27253</b>             | <b>13q21.1</b>       |
| <b>205656_at</b>    | <b>100</b>  | <b>PCDH17</b>              | <b>27253</b>             | <b>13q21.1</b>       |
| <b>230537_at</b>    | <b>100</b>  | <b>PCDH17?</b>             | ---                      | <b>13q21.1</b>       |
| <b>203335_at</b>    | <b>100</b>  | <b>PHYH</b>                | <b>5264</b>              | <b>10p13</b>         |
| <b>1555579_s_at</b> | <b>100</b>  | <b>PTPRM</b>               | <b>5797</b>              | <b>18p11.2</b>       |
| <b>203329_at</b>    | <b>100</b>  | <b>PTPRM</b>               | <b>5797</b>              | <b>18p11.2</b>       |
| <b>1554343_a_at</b> | <b>100</b>  | <b>STAP1</b>               | <b>26228</b>             | <b>4q13.2</b>        |
| <b>220059_at</b>    | <b>100</b>  | <b>STAP1</b>               | <b>26228</b>             | <b>4q13.2</b>        |
| 211890_x_at         | 99.5        | CAPN3                      | 825                      | 15q15.1-q21.1        |
| <b>219470_x_at</b>  | <b>99.5</b> | <b>CCNJ</b>                | <b>54619</b>             | <b>10pter-q26.12</b> |
| 229091_s_at         | 99.5        | CCNJ                       | 54619                    | 10pter-q26.12        |
| 239956_at           | 99.5        | CHST2?                     | ---                      | 3q23                 |
| <b>1552398_a_at</b> | <b>99.5</b> | <b>CLEC12A /// CLEC12B</b> | <b>160364 /// 387837</b> | <b>12p13.2</b>       |
| 219821_s_at         | 99.5        | GFOD1                      | 54438                    | 6pter-p22.1          |
| 239533_at           | 99.5        | GPR155                     | 151556                   | 2q31.1               |
| <b>202409_at</b>    | <b>99.5</b> | <b>IGF2 /// INS-IGF2</b>   | <b>3481 /// 723961</b>   | <b>11p15.5</b>       |
| 230179_at           | 99.5        | LOC285812                  | 285812                   | 6p23                 |
| 202819_s_at         | 99.5        | TCEB3                      | 6924                     | 1p36.1               |
| 232081_at           | 99          | ABCG1?                     | ---                      | 21q22.3              |
| 1561786_at          | 99          | AGAP1*                     | ---                      | 2q37.2               |

|                    |             |                       |                 |                        |
|--------------------|-------------|-----------------------|-----------------|------------------------|
| 1559280_a_at       | 99          | AK092578*             | ---             | 4q32.3                 |
| 1554486_a_at       | 99          | C6orf114              | 85411           | 6p23                   |
| 1558621_at         | 99          | CABLES1               | 91768           | 18q11.2                |
| <b>203921_at</b>   | <b>99</b>   | <b>CHST2</b>          | <b>9435</b>     | <b>3q24</b>            |
| 209087_x_at        | 99          | MCAM                  | 4162            | 11q23.3                |
| <b>211340_s_at</b> | <b>99</b>   | <b>MCAM</b>           | <b>4162</b>     | <b>11q23.3</b>         |
| 223130_s_at        | 99          | MYLIP                 | 29116           | 6p23-p22.3             |
| 228098_s_at        | 99          | MYLIP                 | 29116           | 6p23-p22.3             |
| 226814_at          | 98.5        | ADAMTS9               | 56999           | 3p14.3-p14.2           |
| 238987_at          | 98.5        | B4GALT1               | 2683            | 9p13                   |
| 225499_at          | 98.5        | c20orf74?             | ---             | 20p11.23               |
| 1556593_s_at       | 98.5        | CHST2?                | ---             | 3q23                   |
| 231600_at          | 98.5        | CLEC12B               | 387837          | 12p13.2                |
| 214683_s_at        | 98.5        | CLK1                  | 1195            | 2q33                   |
| <b>201656_at</b>   | <b>98.5</b> | <b>ITGA6</b>          | <b>3655</b>     | <b>2q31.1</b>          |
| 202746_at          | 98.5        | ITM2A                 | 9452            | Xq13.3-Xq21.2          |
| <b>210869_s_at</b> | <b>98.5</b> | <b>MCAM</b>           | <b>4162</b>     | <b>11q23.3</b>         |
| 1569484_s_at       | 98.5        | MDN1                  | 23195           | 6q15                   |
| 228097_at          | 98.5        | MYLIP                 | 29116           | 6p23-p22.3             |
| 229407_at          | 98.5        | SDK1                  | 221935          | 7p22.2                 |
| 209593_s_at        | 98.5        | TOR1B                 | 27348           | 9q34                   |
| 222281_s_at        | 98          | c1orf186*             | ---             | 1q32.1                 |
| 239826_at          | 98          | CABLES1*              | ---             | 18q11.2                |
| 214475_x_at        | 98          | CAPN3                 | 825             | 15q15.1-q21.1          |
| 210944_s_at        | 98          | CAPN3                 | 825             | 15q15.1-q21.1          |
| 1556592_at         | 98          | CHST2?                | ---             | 3q23                   |
| 211623_s_at        | 98          | FBL                   | 2091            | 19q13.1                |
| 234339_s_at        | 98          | GLTSCR2               | 29997           | 19q13.3                |
| 225330_at          | 98          | IGF1R                 | 3480            | 15q26.3                |
| 212978_at          | 98          | LRRC8B                | 23507           | 1p22.2                 |
| <b>215692_s_at</b> | <b>98</b>   | <b>MPPED2</b>         | <b>744</b>      | <b>11p13</b>           |
| <b>205413_at</b>   | <b>98</b>   | <b>MPPED2</b>         | <b>744</b>      | <b>11p13</b>           |
| 223129_x_at        | 98          | MYLIP                 | 29116           | 6p23-p22.3             |
| 232280_at          | 98          | SLC25A29              | 123096          | 14q32.2                |
| 202818_s_at        | 98          | TCEB3                 | 6924            | 1p36.1                 |
| 225127_at          | 98          | TMEM181               | 57583           | 6q25.3                 |
| <b>241535_at</b>   | <b>97.5</b> | ---                   | ---             | <b>2p25.3</b>          |
| 233867_at          | 97.5        | AKAP13*               | ---             | 15q25.3                |
| 212702_s_at        | 97.5        | BICD2                 | 23299           | 9q22.31                |
| 224435_at          | 97.5        | C10orf57 /// C10orf58 | 80195 /// 84293 | 10q22.3 ///<br>10q23.1 |
| 242406_at          | 97.5        | c1orf186*             | ---             | 1q32.1                 |

|                    |             |                        |                      |                 |
|--------------------|-------------|------------------------|----------------------|-----------------|
| 230954_at          | 97.5        | C20orf112              | 140688               | 20q11.1-q11.23  |
| 220331_at          | 97.5        | CYP46A1                | 10858                | 14q32.1         |
| 204836_at          | 97.5        | GLDC                   | 2731                 | 9p22            |
| <b>215177_s_at</b> | <b>97.5</b> | <b>ITGA6</b>           | <b>3655</b>          | <b>2q31.1</b>   |
| 230591_at          | 97.5        | LOC729887              | 729887               | 16q24.1         |
| 227805_at          | 97.5        | MAP1D?                 | ---                  | 2q31.1          |
| 209086_x_at        | 97.5        | MCAM                   | 4162                 | 11q23.3         |
| 223627_at          | 97.5        | MEX3B                  | 84206                | 15q25.2         |
| 220319_s_at        | 97.5        | MYLIP                  | 29116                | 6p23-p22.3      |
| 223096_at          | 97.5        | NOP5/NOP58             | 51602                | 2q33.1          |
| 243612_at          | 97.5        | NSD1                   | 64324                | 5q35.2-q35.3    |
| 214620_x_at        | 97.5        | PAM                    | 5066                 | 5q14-q21        |
| <b>202336_s_at</b> | <b>97.5</b> | <b>PAM</b>             | <b>5066</b>          | <b>5q14-q21</b> |
| 242664_at          | 97.5        | PTPRM*                 | ---                  | 18p11.23        |
| 226342_at          | 97.5        | SPTBN1                 | 6711                 | 2p21            |
| 229594_at          | 97.5        | SPTY2D1                | 144108               | 11p15.1         |
| 239361_at          | 97          | CABLES1*               | ---                  | 18q11.2         |
| 220450_at          | 97          | ---                    | ---                  | 4q31.22         |
| 204567_s_at        | 97          | ABCG1                  | 9619                 | 21q22.3         |
| 229720_at          | 97          | BAG1                   | 573                  | 9p12            |
| 243409_at          | 97          | FOXL1                  | 2300                 | 16q24           |
| 202747_s_at        | 97          | ITM2A                  | 9452                 | Xq13.3-Xq21.2   |
| 212658_at          | 97          | LHFPL2                 | 10184                | 5q14.1          |
| 225611_at          | 97          | LOC100128443 /// MAST4 | 100128443 /// 375449 | 5q12.3          |
| 212239_at          | 97          | PIK3R1                 | 5295                 | 5q13.1          |
| 226143_at          | 97          | RAI1                   | 10743                | 17p11.2         |
| 1552329_at         | 97          | RBBP6                  | 5930                 | 16p12.2         |
| 225305_at          | 97          | SLC25A29               | 123096               | 14q32.2         |

**Table S15.** Top 100 Rank Order Genes Defining ROSE Cluster 8 (R8)

| Probeset           | Rank         | Symbol         | EntrezID      | Cytoband      |
|--------------------|--------------|----------------|---------------|---------------|
| <b>238689_at</b>   | <b>100.0</b> | <b>GPR110</b>  | <b>266977</b> | <b>6p12.3</b> |
| <b>235988_at</b>   | <b>100.0</b> | <b>GPR110</b>  | <b>266977</b> | <b>6p12.3</b> |
| <b>236489_at</b>   | <b>100.0</b> | <b>GPR110?</b> | ---           | <b>6p12.3</b> |
| <b>217109_at</b>   | <b>100.0</b> | <b>MUC4</b>    | <b>4585</b>   | <b>3q29</b>   |
| <b>217110_s_at</b> | <b>99.5</b>  | <b>MUC4</b>    | <b>4585</b>   | <b>3q29</b>   |
| 205795_at          | 99.5         | NRXN3          | 9369          | 14q31         |
| 216565_x_at        | 99.0         | ---            | ---           | 1p36.11       |
| 214022_s_at        | 99.0         | IFITM1         | 8519          | 11p15.5       |
| 201601_x_at        | 99.0         | IFITM1         | 8519          | 11p15.5       |
| <b>204895_x_at</b> | <b>99.0</b>  | <b>MUC4</b>    | <b>4585</b>   | <b>3q29</b>   |

|                    |             |                   |                  |                       |
|--------------------|-------------|-------------------|------------------|-----------------------|
| 206873_at          | 98.5        | CA6               | 765              | 1p36.2                |
| 201028_s_at        | 98.5        | CD99              | 4267             | Xp22.32; Yp11.3       |
| 242051_at          | 98.5        | CD99?             | ---              | Xp22.32; Yp11.3       |
| 240586_at          | 98.5        | ENAM              | 10117            | 4q13.3                |
| <b>212592_at</b>   | <b>98.5</b> | <b>IGJ</b>        | <b>3512</b>      | <b>4q21</b>           |
| 223304_at          | 98.5        | SLC37A3           | 84255            | 7q34                  |
| 1569666_s_at       | 98.5        | SLC37A3*          | ---              | 7q34                  |
| 238063_at          | 98.5        | TMEM154           | 201799           | 4q31.3                |
| 207900_at          | 98.0        | CCL17             | 6361             | 16q13                 |
| 201029_s_at        | 98.0        | CD99              | 4267             | Xp22.32; Yp11.3       |
| 214907_at          | 98.0        | CEACAM21          | 90273            | 19q13.2               |
| 201315_x_at        | 98.0        | IFITM2            | 10581            | 11p15.5               |
| 222154_s_at        | 98.0        | LOC26010          | 26010            | 2q33.1                |
| 211675_s_at        | 98.0        | MDFIC             | 29969            | 7q31.1-q31.2          |
| 239272_at          | 98.0        | MMP28             | 79148            | 17q11-q21.1           |
| 212183_at          | 98.0        | NUDT4 /// NUDT4P1 | 11163 /// 440672 | 12q21 /// 1q21.1      |
| 212181_s_at        | 98.0        | NUDT4 /// NUDT4P1 | 11163 /// 440672 | 12q21 /// 1q21.1      |
| 220024_s_at        | 98.0        | PRX               | 57716            | 19q13.13-q13.2        |
| 207426_s_at        | 98.0        | TNFSF4            | 7292             | 1q25                  |
| <b>208303_s_at</b> | <b>97.4</b> | <b>CRLF2</b>      | <b>64109</b>     | <b>Xp22.3; Yp11.3</b> |
| 205983_at          | 97.4        | DPEP1             | 1800             | 16q24.3               |
| <b>207651_at</b>   | <b>97.4</b> | <b>GPR171</b>     | <b>29909</b>     | <b>3q25.1</b>         |
| <b>213371_at</b>   | <b>97.4</b> | <b>LDB3</b>       | <b>11155</b>     | <b>10q22.3-q23.2</b>  |
| 1559315_s_at       | 97.4        | LOC144481         | 144481           | 12q22                 |
| 226382_at          | 97.4        | LOC283070         | 283070           | 10p14                 |
| 229334_at          | 97.4        | RUFY3             | 22902            | 4q13.3                |
| 225244_at          | 97.4        | SNAP47            | 116841           | 1q42.13               |
| 203372_s_at        | 97.4        | SOCS2             | 8835             | 12q                   |
| 244721_at          | 97.4        | TP53INP1          | 94241            | 8q22                  |
| 218862_at          | 96.9        | ASB13             | 79754            | 10p15.1               |
| 206150_at          | 96.9        | CD27              | 939              | 12p13                 |
| 218013_x_at        | 96.9        | DCTN4             | 51164            | 5q31-q32              |
| 219777_at          | 96.9        | GIMAP6            | 474344           | ---                   |
| 233884_at          | 96.9        | HIVEP3            | 59269            | 1p34                  |
| 203435_s_at        | 96.9        | MME               | 4311             | 3q25.1-q25.2          |
| 239273_s_at        | 96.9        | MMP28             | 79148            | 17q11-q21.1           |
| 202149_at          | 96.9        | NEDD9             | 4739             | 6p25-p24              |
| 205259_at          | 96.9        | NR3C2             | 4306             | 4q31.1                |
| 215021_s_at        | 96.9        | NRXN3             | 9369             | 14q31                 |
| 236750_at          | 96.9        | NRXN3*            | ---              | 14q31.1               |
| 228696_at          | 96.9        | SLC45A3           | 85414            | 1q32.1                |

|                  |             |               |            |                 |
|------------------|-------------|---------------|------------|-----------------|
| 223741_s_at      | 96.9        | TTYH2         | 94015      | 17q25.1         |
| 219141_s_at      | 96.4        | AMBRA1        | 55626      | 11p11.2         |
| 230161_at        | 96.4        | CD99*         | ---        | Xp22.32; Yp11.3 |
| 223377_x_at      | 96.4        | CISH          | 1154       | 3p21.3          |
| 229114_at        | 96.4        | GAB1          | 2549       | 4q31.21         |
| 1552316_a_at     | 96.4        | GIMAP1        | 170575     | 7q36.1          |
| 229649_at        | 96.4        | NRXN3         | 9369       | 14q31           |
| 226433_at        | 96.4        | RNF157        | 114804     | 17q25.1         |
| 220454_s_at      | 96.4        | SEMA6A        | 57556      | 5q23.1          |
| 225660_at        | 96.4        | SEMA6A        | 57556      | 5q23.1          |
| 230747_s_at      | 96.4        | TTC39C        | 125488     | 18q11.2         |
| 1555194_at       | 96.4        | TTC39C*       | ---        | 18q11.2         |
| 203756_at        | 95.9        | ARHGEF17      | 9828       | 11q13.4         |
| 242579_at        | 95.9        | BMPR1B        | 658        | 4q22-q24        |
| 212974_at        | 95.9        | DENND3        | 22898      | 8q24.3          |
| 217967_s_at      | 95.9        | FAM129A       | 116496     | 1q25            |
| 226002_at        | 95.9        | GAB1          | 2549       | 4q31.21         |
| 207375_s_at      | 95.9        | IL15RA        | 3601       | 10p15-p14       |
| 208071_s_at      | 95.9        | LAIR1         | 3903       | 19q13.4         |
| 210644_s_at      | 95.9        | LAIR1         | 3903       | 19q13.4         |
| 215020_at        | 95.9        | NRXN3         | 9369       | 14q31           |
| 238297_at        | 95.9        | PHACTR1*      | ---        | 6p24.1          |
| 210830_s_at      | 95.9        | PON2          | 5445       | 7q21.3          |
| 203373_at        | 95.9        | SOCS2         | 8835       | 12q             |
| 225912_at        | 95.9        | TP53INP1      | 94241      | 8q22            |
| 225108_at        | 95.4        | AGPS          | 8540       | 2q31.2          |
| <b>229975_at</b> | <b>95.4</b> | <b>BMPR1B</b> | <b>658</b> | <b>4q22-q24</b> |
| 202910_s_at      | 95.4        | CD97          | 976        | 19p13           |
| 216605_s_at      | 95.4        | CEACAM21      | 90273      | 19q13.2         |
| 229604_at        | 95.4        | CMAH          | 8418       | 6p21.32         |
| 1556037_s_at     | 95.4        | HHIP          | 64399      | 4q28-q32        |
| 244764_at        | 95.4        | HIVEP3*       | ---        | 1p34.2          |
| 222762_x_at      | 95.4        | LIMD1         | 8994       | 3p21.3          |
| 236632_at        | 95.4        | LOC646576     | 646576     | 4q31.22         |
| 240457_at        | 95.4        | NEURL1B*      | ---        | 5q35.1          |
| 1553995_a_at     | 95.4        | NT5E          | 4907       | 6q14-q21        |
| 219812_at        | 95.4        | PVRIG         | 79037      | 7q22.1          |
| 52731_at         | 94.9        | AMBRA1        | 55626      | 11p11.2         |
| 236766_at        | 94.9        | C8orf38*      | ---        | 8q22.1          |
| 221223_x_at      | 94.9        | CISH          | 1154       | 3p21.3          |
| 209210_s_at      | 94.9        | FERMT2        | 10979      | 14q22.2         |



|             |      |                         |                     |               |
|-------------|------|-------------------------|---------------------|---------------|
| 238880_at   | 94.9 | GTF3A                   | 2971                | 13q12.3-q13.1 |
| 212203_x_at | 94.9 | IFITM3                  | 10410               | 11p15.5       |
| 209695_at   | 94.9 | LOC100131062 /// PTP4A3 | 100131062 /// 11156 | 8q24.3        |
| 51146_at    | 94.9 | PIGV                    | 55650               | 1p36.11       |
| 219238_at   | 94.9 | PIGV                    | 55650               | 1p36.11       |
| 48106_at    | 94.9 | SLC48A1                 | 55652               | 12q13.11      |
| 226838_at   | 94.9 | TTC32                   | 130502              | 2p24.1        |
| 230643_at   | 94.9 | WNT9A                   | 7483                | 1q42          |

**Table S16.** Top 100 Rank Order Genes Associated with Unclustered ROSE Samples (R7)

| Probeset         | Percentile  | Symbol            | EntrezID         | Cytoband               |
|------------------|-------------|-------------------|------------------|------------------------|
| 220230_s_at      | 96.2        | CYB5R2            | 51700            | 11p15.4                |
| 212188_at        | 93.7        | KCTD12            | 115207           | 13q22.3                |
| 242593_at        | 93.1        | ---               | ---              | ?                      |
| 1564878_at       | 93.1        | ---               | ---              | 12q24.23-q24.31        |
| 227435_at        | 93.1        | KIAA2018          | 205717           | 3q13.2                 |
| 226869_at        | 93.1        | MEGF6             | 1953             | 1p36.3                 |
| 200866_s_at      | 93.1        | PSAP              | 5660             | 10q21-q22              |
| 212956_at        | 93.1        | TBC1D9            | 23158            | 4q31.21                |
| 205987_at        | 91.8        | CD1C              | 911              | 1q22-q23               |
| 229288_at        | 91.8        | EPHA7             | 2045             | 6q16.1                 |
| 229716_at        | 91.2        | ---               | ---              | 1p36.12                |
| 1556682_s_at     | 91.2        | AUTS2*            | ---              | 7q11.22                |
| 226640_at        | 91.2        | DAGLB             | 221955           | 7p22.1                 |
| 238533_at        | 91.2        | EPHA7             | 2045             | 6q16.1                 |
| 204396_s_at      | 91.2        | GRK5              | 2869             | 10q24-qter             |
| 240413_at        | 91.2        | PYHIN1            | 149628           | 1q23.1                 |
| 213164_at        | 91.2        | SLC5A3            | 6526             | 21q22.12               |
| 242644_at        | 91.2        | TMC8              | 147138           | 17q25.3                |
| 237946_at        | 90.6        | ---               | ---              | 11p15.4                |
| 229967_at        | 90.6        | CMTM2             | 146225           | 16q21                  |
| 221773_at        | 90.6        | ELK3              | 2004             | 12q23                  |
| 205718_at        | 90.6        | ITGB7             | 3695             | 12q13.13               |
| <b>212192_at</b> | <b>90.6</b> | <b>KCTD12</b>     | <b>115207</b>    | <b>13q22.3</b>         |
| 1559263_s_at     | 90.6        | PPIL4 /// ZC3H12D | 340152 /// 85313 | 6q24-q25 ///<br>6q25.1 |
| 218613_at        | 90.6        | PSD3              | 23362            | 8pter-p23.3            |
| 203355_s_at      | 90.6        | PSD3              | 23362            | 8pter-p23.3            |
| 221808_at        | 90.6        | RAB9A             | 9367             | Xp22.2                 |
| 227210_at        | 90.6        | SFMBT2?           | ---              | 10p14                  |

|                    |             |                         |                    |                 |
|--------------------|-------------|-------------------------|--------------------|-----------------|
| 202912_at          | 89.9        | ADM                     | 133                | 11p15.4         |
| 205290_s_at        | 89.9        | BMP2                    | 650                | 20p12           |
| <b>219837_s_at</b> | <b>89.9</b> | <b>CYTL1</b>            | <b>54360</b>       | <b>4p16-p15</b> |
| 213316_at          | 89.9        | KIAA1462                | 57608              | 10p11.23        |
| 210629_x_at        | 89.9        | LST1                    | 7940               | 6p21.3          |
| 220122_at          | 89.9        | MCTP1                   | 79772              | 5q15            |
| 214735_at          | 89.9        | PIP3-E                  | 26034              | 6q25.2          |
| 209568_s_at        | 89.9        | RGL1                    | 23179              | 1q25.3          |
| 226207_at          | 89.9        | RILPL1                  | 353116             | 12q24.31        |
| 212944_at          | 89.9        | SLC5A3                  | 6526               | 21q22.12        |
| 207777_s_at        | 89.9        | SP140                   | 11262              | 2q37.1          |
| 226080_at          | 89.9        | SSH2                    | 85464              | 17q11.2         |
| 230590_at          | 89.9        | SSH2*                   | ---                | 17q11.2         |
| 223375_at          | 89.9        | TBC1D22B                | 55633              | 6p21.2          |
| 224967_at          | 89.9        | UGCG                    | 7357               | 9q31            |
| 213618_at          | 89.3        | ARAP2                   | 116984             | 4p14            |
| 203923_s_at        | 89.3        | CYBB                    | 1536               | Xp21.1          |
| 225833_at          | 89.3        | DAGLB                   | 221955             | 7p22.1          |
| 214574_x_at        | 89.3        | LST1                    | 7940               | 6p21.3          |
| 207339_s_at        | 89.3        | LTB                     | 4050               | 6p21.3          |
| 217418_x_at        | 89.3        | MS4A1                   | 931                | 11q12           |
| 200871_s_at        | 89.3        | PSAP                    | 5660               | 10q21-q22       |
| 216748_at          | 89.3        | PYHIN1                  | 149628             | 1q23.1          |
| 204688_at          | 89.3        | SGCE                    | 8910               | 7q21-q22        |
| 204328_at          | 89.3        | TMC6                    | 11322              | 17q25.3         |
| 227353_at          | 89.3        | TMC8                    | 147138             | 17q25.3         |
| 233596_at          | 89.3        | UIMC1*                  | ---                | 5q35.2          |
| 229040_at          | 88.7        | BC40064*                | ---                | 21q22.3         |
| 203922_s_at        | 88.7        | CYBB                    | 1536               | Xp21.1          |
| 204057_at          | 88.7        | IRF8                    | 3394               | 16q24.1         |
| 218656_s_at        | 88.7        | LHFP                    | 10186              | 13q12           |
| 211101_x_at        | 88.7        | LILRA2                  | 11027              | 19q13.4         |
| 239062_at          | 88.7        | LOC100131096            | 100131096          | 17q25.3         |
| 206940_s_at        | 88.7        | LOC100131317 /// POU4F1 | 100131317 /// 5457 | 13q31.1         |
| 211581_x_at        | 88.7        | LST1                    | 7940               | 6p21.3          |
| 244230_at          | 88.7        | MEF2C*                  | ---                | 5q14.3          |
| 1569136_at         | 88.7        | MGAT4A                  | 11320              | 2q12            |
| 1569931_at         | 88.7        | NCOR2*                  | ---                | 12q24.31        |
| 241387_at          | 88.7        | PTK2*                   | ---                | 8q24.3          |
| 41220_at           | 88.7        | SEPT9*                  | 10801              | 17q25.2-q25.3   |
| 208657_s_at        | 88.7        | SEPT9*                  | 10801              | 17q25.2-q25.3   |

|              |      |                                                                          |                                                                      |              |
|--------------|------|--------------------------------------------------------------------------|----------------------------------------------------------------------|--------------|
| 231837_at    | 88.7 | USP28                                                                    | 57646                                                                | 11q23        |
| 1552678_a_at | 88.7 | USP28                                                                    | 57646                                                                | 11q23        |
| 236635_at    | 88.7 | ZNF667                                                                   | 63934                                                                | 19q13.43     |
| 231418_at    | 88.1 | ---                                                                      | ---                                                                  | 11q12.2      |
| 229041_s_at  | 88.1 | BC40064*                                                                 | ---                                                                  | 21q22.3      |
| 205289_at    | 88.1 | BMP2                                                                     | 650                                                                  | 20p12        |
| 37170_at     | 88.1 | BMP2K                                                                    | 55589                                                                | 4q21.21      |
| 225828_at    | 88.1 | DAGLB                                                                    | 221955                                                               | 7p22.1       |
| 214966_at    | 88.1 | GRIK5                                                                    | 2901                                                                 | 19q13.2      |
| 1555349_a_at | 88.1 | ITGB2                                                                    | 3689                                                                 | 21q22.3      |
| 227433_at    | 88.1 | KIAA2018                                                                 | 205717                                                               | 3q13.2       |
| 232935_at    | 88.1 | LHFP*                                                                    | ---                                                                  | 13q13.3      |
| 215633_x_at  | 88.1 | LST1                                                                     | 7940                                                                 | 6p21.3       |
| 214181_x_at  | 88.1 | LST1                                                                     | 7940                                                                 | 6p21.3       |
| 242191_at    | 88.1 | NBPF10 /// RP11-94I2.2                                                   | 100132406 /// 200030                                                 | 1q21.1       |
| 209949_at    | 88.1 | NCF2                                                                     | 4688                                                                 | 1q25         |
| 206370_at    | 88.1 | PIK3CG                                                                   | 5294                                                                 | 7q22.3       |
| 203038_at    | 88.1 | PTPRK                                                                    | 5796                                                                 | 6q22.2-q22.3 |
| 204319_s_at  | 88.1 | RGS10                                                                    | 6001                                                                 | 10q25        |
| 220922_s_at  | 88.1 | SPANXA1 /// SPANXA2 ///<br>SPANXB1 /// SPANXB2 ///<br>SPANXC /// SPANXF1 | 100133171 /// 171490<br>/// 30014 /// 64663 ///<br>728695 /// 728712 | Xq27.1       |
| 230970_at    | 88.1 | SSH2*                                                                    | ---                                                                  | 17q11.2      |
| 222942_s_at  | 88.1 | TIAM2                                                                    | 26230                                                                | 6q25.2       |
| 214958_s_at  | 88.1 | TMC6                                                                     | 11322                                                                | 17q25.3      |
| 204881_s_at  | 88.1 | UGCG                                                                     | 7357                                                                 | 9q31         |
| 221765_at    | 88.1 | UGCG                                                                     | 7357                                                                 | 9q31         |
| 220586_at    | 87.4 | CHD9                                                                     | 80205                                                                | 16q12.2      |
| 229268_at    | 87.4 | FAM105B                                                                  | 90268                                                                | 5p15.2       |
| 225140_at    | 87.4 | KLF3                                                                     | 51274                                                                | 4p14         |
| 244741_s_at  | 87.4 | MGC9913                                                                  | 386759                                                               | 19q13.43     |
| 231199_at    | 87.4 | NAT13*                                                                   | ---                                                                  | 3q13.2       |
| 235652_at    | 87.4 | SCML1*                                                                   | ---                                                                  | Xp22.2       |

**Table S17.** Top 100 Ross<sup>1</sup> BCR-ABL Probe Sets Compared to ROSE Clustering and Top Rank Order

| Probe Set ID | Gene Symbol | Cytoband | ROSE Clustering | Rank Order Group |
|--------------|-------------|----------|-----------------|------------------|
| 224811_at    | ---         | ---      |                 |                  |
| 226345_at    | ---         | ---      |                 |                  |
| 240173_at    | ---         | ---      |                 |                  |
| 240499_at    | ---         | ---      |                 |                  |
| 202123_s_at  | ABL1        | 9q34.1   |                 | R4               |

|             |          |                 |     |    |
|-------------|----------|-----------------|-----|----|
| 209321_s_at | ADCY3    | 2p23.3          |     |    |
| 223075_s_at | AIF1L    | 9q34.13-q34.3   |     |    |
| 214255_at   | ATP10A   | 15q11.2         |     |    |
| 219218_at   | BAHCC1   | 17q25.3         |     |    |
| 229975_at   | BMPR1B   | 4q22-q24        | Yes | R8 |
| 242579_at   | BMPR1B   | 4q22-q24        | Yes | R8 |
| 201310_s_at | C5orf13  | 5q22.1          |     |    |
| 200655_s_at | CALM1    | 14q24-q31       |     |    |
| 205467_at   | CASP10   | 2q33-q34        |     |    |
| 200951_s_at | CCND2    | 12p13           |     |    |
| 200953_s_at | CCND2    | 12p13           |     |    |
| 206150_at   | CD27     | 12p13           |     | R8 |
| 201028_s_at | CD99     | Xp22.32; Yp11.3 |     | R8 |
| 201029_s_at | CD99     | Xp22.32; Yp11.3 |     | R8 |
| 242051_at   | CD99*    | ---             |     | R8 |
| 202717_s_at | CDC16    | 13q34           |     |    |
| 212862_at   | CDS2     | 20p13           |     |    |
| 213385_at   | CHN2     | 7p15.3          |     |    |
| 204576_s_at | CLUAP1   | 16p13.3         |     |    |
| 201445_at   | CNN3     | 1p22-p21        | Yes | R5 |
| 228297_at   | CNN3*    | ---             | Yes | R5 |
| 201906_s_at | CTDSPL   | 3p21.3          |     |    |
| 218013_x_at | DCTN4    | 5q31-q32        |     | R8 |
| 222488_s_at | DCTN4    | 5q31-q32        |     | R8 |
| 209365_s_at | ECM1     | 1q21            |     |    |
| 217967_s_at | FAM129A  | 1q25            |     | R8 |
| 202771_at   | FAM38A   | 16q24.3         |     |    |
| 222729_at   | FBXW7    | 4q31.3          |     |    |
| 219871_at   | FLJ13197 | 4p14            |     |    |
| 218084_x_at | FXYS5    | 19q12-q13.1     |     |    |
| 216033_s_at | FYN      | 6q21            |     |    |
| 64064_at    | GIMAP5   | 7q36.1          |     |    |
| 229367_s_at | GIMAP6   | ---             |     |    |
| 235988_at   | GPR110   | 6p12.3          | Yes | R8 |
| 238689_at   | GPR110   | 6p12.3          | Yes | R8 |
| 236489_at   | GPR110*  | ---             | Yes | R8 |
| 202947_s_at | GYPC     | 2q14-q21        |     | R4 |
| 203089_s_at | HTRA2    | 2p12            |     |    |
| 208881_x_at | IDI1     | 10p15.3         |     |    |
| 212203_x_at | IFITM3   | 11p15.5         |     | R8 |
| 212592_at   | IGJ      | 4q21            | Yes | R8 |

|             |                          |                 |     |    |
|-------------|--------------------------|-----------------|-----|----|
| 222868_s_at | IL18BP                   | 11q13           |     |    |
| 202794_at   | INPP1                    | 2q32            |     |    |
| 205376_at   | INPP4B                   | 4q31.21         |     |    |
| 201656_at   | ITGA6                    | 2q31.1          | Yes | R6 |
| 205055_at   | ITGAE                    | 17p13           |     |    |
| 229139_at   | JPH1                     | 8q21            |     |    |
| 208071_s_at | LAIR1                    | 19q13.4         |     | R8 |
| 205269_at   | LCP2                     | 5q33.1-qter     |     |    |
| 205270_s_at | LCP2                     | 5q33.1-qter     |     |    |
| 222762_x_at | LIMD1                    | 3p21.3          |     | R8 |
| 215617_at   | LOC26010                 | 2q33.1          |     | R8 |
| 222154_s_at | LOC26010                 | 2q33.1          |     | R8 |
| 241812_at   | LOC26010                 | 2q33.1          |     | R8 |
| 225799_at   | LOC541471 /// NCRNA00152 | 2p11.2 /// 2q13 |     |    |
| 238488_at   | LRRC70                   | 5q12.1          |     |    |
| 203005_at   | LTBR                     | 12p13           |     |    |
| 239273_s_at | MMP28                    | 17q11-q21.1     |     | R8 |
| 217110_s_at | MUC4                     | 3q29            | Yes | R8 |
| 218966_at   | MYO5C                    | 15q21           |     |    |
| 205259_at   | NR3C2                    | 4q31.1          |     | R8 |
| 212298_at   | NRP1                     | 10p12           |     |    |
| 239519_at   | NRP1*                    | ---             |     |    |
| 204004_at   | PAWR                     | 12q21           |     |    |
| 201876_at   | PON2                     | 7q21.3          |     | R8 |
| 210830_s_at | PON2                     | 7q21.3          |     | R8 |
| 213093_at   | PRKCA                    | 17q22-q23.2     |     |    |
| 218764_at   | PRKCH                    | 14q22-q23       |     |    |
| 220024_s_at | PRX                      | 19q13.13-q13.2  |     | R8 |
| 219938_s_at | PSTPIP2                  | 18q12           |     |    |
| 200863_s_at | RAB11A                   | 15q21.3-q22.31  |     |    |
| 200864_s_at | RAB11A                   | 15q21.3-q22.31  |     |    |
| 209229_s_at | SAPS1                    | 19q13.42        |     |    |
| 215028_at   | SEMA6A                   | 5q23.1          |     | R8 |
| 223449_at   | SEMA6A                   | 5q23.1          |     | R8 |
| 225660_at   | SEMA6A                   | 5q23.1          |     | R8 |
| 225913_at   | SGK269                   | 15q24.3         |     |    |
| 204429_s_at | SLC2A5                   | 1p36.2          |     |    |
| 204430_s_at | SLC2A5                   | 1p36.2          |     |    |
| 48106_at    | SLC48A1                  | 12q13.11        |     | R8 |
| 225244_at   | SNAP47                   | 1q42.13         |     | R8 |

|             |          |              |  |    |
|-------------|----------|--------------|--|----|
| 200665_s_at | SPARC    | 5q31.3-q32   |  |    |
| 212458_at   | SPRED2   | 2p14         |  |    |
| 203217_s_at | ST3GAL5  | 2p11.2       |  |    |
| 216985_s_at | STX3     | 11q12.1      |  |    |
| 220684_at   | TBX21    | 17q21.32     |  | R4 |
| 219315_s_at | TMEM204  | 16p13.3      |  |    |
| 203508_at   | TNFRSF1B | 1p36.3-p36.2 |  |    |
| 207196_s_at | TNIP1    | 5q32-q33.1   |  |    |
| 200742_s_at | TPP1     | 11p15        |  |    |
| 202369_s_at | TRAM2    | 6p21.1-p12   |  |    |
| 202242_at   | TSPAN7   | Xp11.4       |  |    |
| 212242_at   | TUBA4A   | 2q35         |  |    |
| 218348_s_at | ZC3H7A   | 16p13-p12    |  |    |
| 228046_at   | ZNF827   | 4q31.22      |  |    |

**Table S18.** Genes/Probe Sets Common to Rank Order and *BCR-ABL1*-like Signature<sup>2</sup>

| <b>BCR-ABL up-regulated</b> |         | <b>BCR-ABL down-regulated</b> |         |
|-----------------------------|---------|-------------------------------|---------|
| Gene                        | Cluster | Gene                          | Cluster |
| 216565_x_at                 | R8      | BACH2                         | R2      |
| ABL1                        | R4      | CSF2RB                        | R3      |
| AGPS                        | R4/R8   | CYP46A1                       | R6      |
| CA6                         | R8      | IRS1                          | R2      |
| CD97                        | R8      | KIAA0922                      | R3      |
| CD99                        | R8      | LY9                           | R4      |
| CNN3                        | R5      | PHYH                          | R6      |
| DCTN4                       | R8      | WWC3                          | R2      |
| GIMAP6                      | R8      |                               |         |
| GYPC                        | R4      |                               |         |
| HIVEP2                      | R6      |                               |         |
| IFITM1                      | R8      |                               |         |
| IFITM3                      | R8      |                               |         |
| IGJ                         | R8      |                               |         |
| IL2RA                       | R6      |                               |         |
| LIMD1                       | R8      |                               |         |
| MMP28                       | R8      |                               |         |
| MUC4                        | R8      |                               |         |
| PON2                        | R8      |                               |         |
| PRX                         | R8      |                               |         |
| SEMA6A                      | R8      |                               |         |



## GENOME-WIDE COPY NUMBER VARIATION ASSOCIATION WITH ROSE CLUSTER GROUPS

**Table S20. Copy Number Analysis (CNA) Variations Associated with ROSE Clusters<sup>1</sup>**

The CNA variations are shown along with their membership in each ROSE cluster. FET indicates the *P* value for this results as determined by Fisher's Exact Test. CNA variations are sorted in ascending order by *P* values.

|                            | R1 | R2 | R3 | R4 | R5 | R6 | R7  | R8   | Total | FET     |                              |
|----------------------------|----|----|----|----|----|----|-----|------|-------|---------|------------------------------|
| Cases evaluated            | 20 | 22 | 12 | 13 | 10 | 21 | 76  | 24   |       | p-value | Comments                     |
| 1q (gain) <sup>2</sup>     | 0  | 14 | 1  | 1  | 0  | 0  | 1   | 0    | 17    | <0.0001 | R2 contains <i>TCF3-PBX1</i> |
| <i>IKZF1</i>               | 1  | 0  | 0  | 3  | 3  | 6  | 24  | 22   | 59    | <0.0001 |                              |
| <i>CDKN2A/B</i>            | 4  | 9  | 11 | 11 | 1  | 5  | 40  | 15   | 96    | <0.0001 |                              |
| <i>TCF3</i>                | 0  | 14 | 0  | 0  | 2  | 2  | 2   | 0    | 20    | <0.0001 | R2 contains <i>TCF3-PBX1</i> |
| <i>ERG</i>                 | 0  | 0  | 0  | 1  | 0  | 8  | 0   | 0    | 9     | <0.0001 |                              |
| <i>VPREB1</i>              | 0  | 0  | 0  | 5  | 1  | 8  | 23  | 14   | 51    | <0.0001 |                              |
| B cell pathway             | 5  | 17 | 5  | 12 | 4  | 12 | 54  | 23   | 132   | <0.0001 |                              |
| B pathway w/ <i>VPREB1</i> | 5  | 17 | 5  | 12 | 5  | 14 | 56  | 24   | 138   | <0.0001 |                              |
| <i>PAX5</i>                | 1  | 9  | 4  | 11 | 0  | 3  | 28  | 7    | 63    | <0.0001 |                              |
| <i>JAK1/2</i> (mutation)   | 0  | 0  | 0  | 0  | 0  | 0  | 2/5 | 1/11 | 0     | <0.0001 |                              |
| <i>EBF1</i>                | 0  | 0  | 0  | 0  | 0  | 0  | 4   | 9    | 13    | 0.0001  |                              |
| <i>TBL1XR1</i>             | 0  | 0  | 3  | 0  | 1  | 1  | 0   | 0    | 5     | 0.0005  |                              |
| <i>NUP160-PTPRJ</i>        | 0  | 0  | 0  | 0  | 0  | 0  | 0   | 4    | 4     | 0.0028  |                              |
| <i>ETV6</i>                | 1  | 0  | 2  | 2  | 4  | 1  | 14  | 0    | 24    | 0.0055  |                              |
| <i>IL3RA-CSF2RA</i>        | 0  | 0  | 0  | 0  | 1  | 0  | 6   | 7    | 14    | 0.0064  | High <i>CRLF2</i> expression |
| <i>C20orf94</i>            | 0  | 0  | 0  | 1  | 1  | 0  | 7   | 7    | 16    | 0.0102  |                              |
| <i>DMD</i>                 | 0  | 5  | 1  | 0  | 2  | 3  | 3   | 0    | 14    | 0.0109  |                              |
| <i>RAG1/2</i>              | 1  | 0  | 0  | 0  | 0  | 0  | 1   | 5    | 7     | 0.0144  |                              |
| <i>ADD3</i>                | 0  | 1  | 0  | 2  | 0  | 0  | 7   | 7    | 17    | 0.0156  |                              |
| <i>GRIK2</i>               | 0  | 2  | 0  | 2  | 2  | 0  | 2   | 4    | 12    | 0.0195  |                              |
| <i>NF1</i>                 | 1  | 1  | 0  | 0  | 2  | 0  | 0   | 1    | 5     | 0.0269  |                              |
| <i>ARMC2-SESN1</i>         | 0  | 2  | 0  | 1  | 2  | 0  | 3   | 5    | 13    | 0.0297  |                              |
| <i>ADARB2</i>              | 0  | 0  | 0  | 0  | 0  | 2  | 0   | 2    | 4     | 0.0658  |                              |
| <i>BTLA-CD200</i>          | 0  | 0  | 0  | 1  | 0  | 0  | 5   | 5    | 11    | 0.0764  |                              |
| <i>BTG1</i>                | 0  | 0  | 1  | 1  | 2  | 2  | 8   | 6    | 20    | 0.0843  |                              |
| <i>ELF1</i>                | 0  | 5  | 0  | 1  | 1  | 0  | 5   | 1    | 13    | 0.0971  |                              |
| <i>IL1RAP</i>              | 0  | 0  | 2  | 0  | 0  | 0  | 1   | 0    | 3     | 0.1205  |                              |
| <i>FLNB</i>                | 0  | 0  | 0  | 0  | 0  | 2  | 1   | 2    | 5     | 0.2306  |                              |

<sup>1</sup>All p-values are derived from Fisher's Exact Test.

<sup>2</sup>All abnormalities are losses unless otherwise indicated



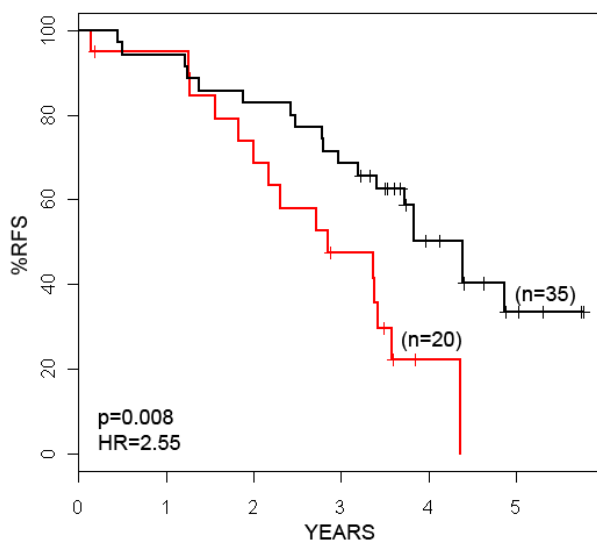

**Figure S3. Survival of *IKZF1*-positive patients in R8 compared to not-R8.** *IKZF1*-positive patients were divided into those in cluster 8 (red line) and those in other clusters (black line). The p-value and hazard ratio for this comparison are given in the lower left panel.

### CLUSTERING OF CCG 1961 WITH R8 PROBE SETS

In order to further illustrate that the probe sets identified by ROSE in P9906 and CCG 1961 are highly related and associated with outcome, several of the R8 probe sets from P9906 that were both among the outliers selected and also included in the top rank order of R8 were used to generate a heat map with CCG 1961 samples. Figure S4 shows the results of this clustering and highlights in black those samples that relapse. It is clear that a small subset of these probe sets (representing only 4 genes: *MUC4*, *IGJ*, *GPR110* and *LDB3*) identify the majority of patients who relapse.

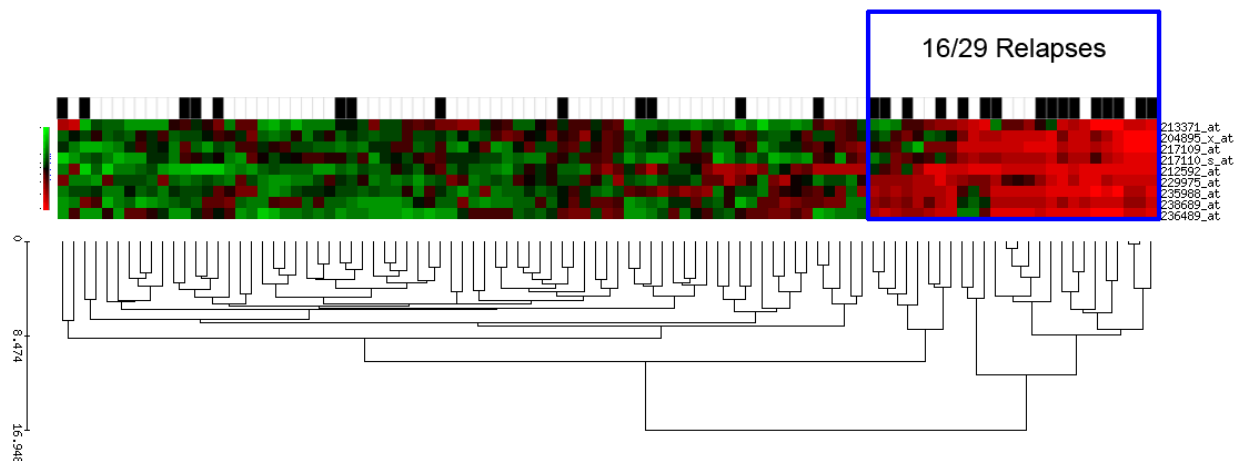

**Figure S4. Heat map of CCG 1961 Samples Using P9906 R8 Probe Sets.** Nine probe sets, representing four genes, were selected from the most highly conserved from the ROSE P9906 clustering. These nine probe sets were among the 254 used for P9906 clustering and also were among the top rank order probe sets for R8. Black boxes across the top of the heat map indicate patients who relapsed. Sixteen of the 29 relapses (55%) occur within a group of samples having greatly elevated expression of two or more of these genes.

## REFERENCES

1. Ross ME, Zhou XD, Song GC, et al. Classification of pediatric acute lymphoblastic leukemia by gene expression profiling. *Blood*. 2003;102(8):2951-2959.
2. Mullighan CG, Su X, Zhang J, et al. Deletion of *IKZF1* and prognosis in acute lymphoblastic leukemia. *N Engl J Med*. 2009;360(5):470-480.
3. Borowitz MJ, Devidas M, Hunger SP, et al. Clinical significance of minimal residual disease in childhood acute lymphoblastic leukemia and its relationship to other prognostic factors: a Children's Oncology Group study. *Blood*. 2008;111(12):5477-5485.
4. Bhojwani D, Kang H, Menezes RX, et al. Gene expression signatures predictive of early response and outcome in high-risk childhood acute lymphoblastic leukemia: a Children's Oncology Group Study on behalf of the Dutch Childhood Oncology Group and the German Cooperative Study Group for Childhood Acute Lymphoblastic Leukemia. *J Clin Oncol*. 2008;26(27):4376-4384.
5. Tomlins SA, Rhodes DR, Perner S, et al. Recurrent fusion of *TMPRSS2* and *ETS* transcription factor genes in prostate cancer. *Science*. 2005;310(5748):644-648.
